# Supplementary material for: A CTP-dependent gating mechanism enables ParB spreading on DNA
Source: eLife journal article supplement (doi:10.7554/elife.69676), 2021-08-01

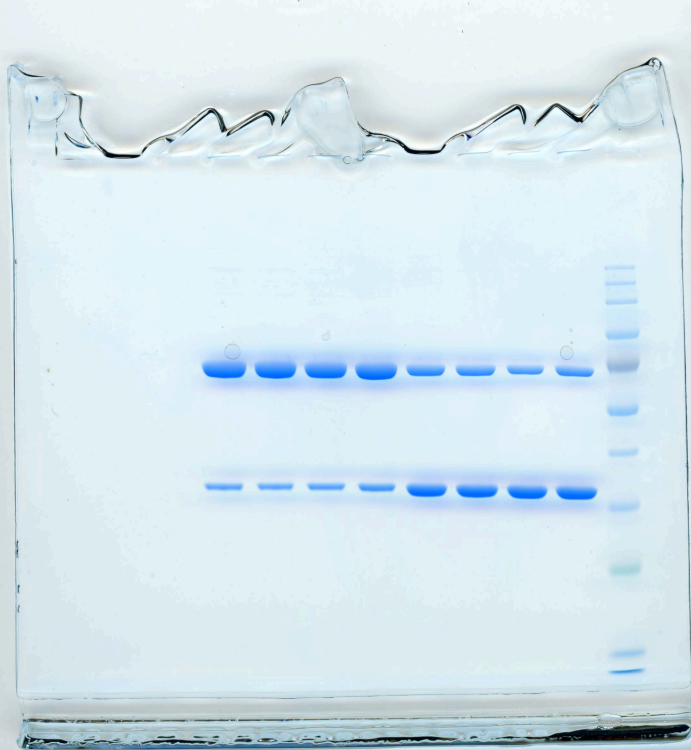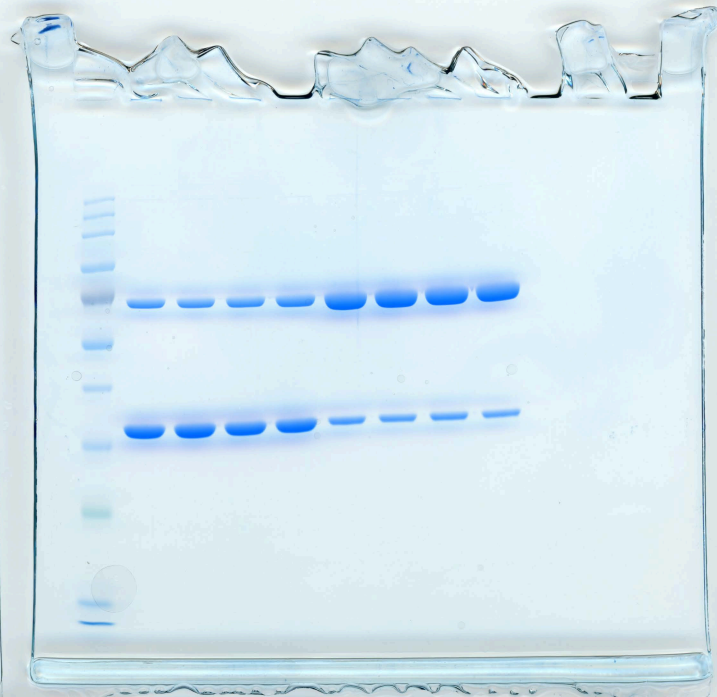

ParB (WT)

lanes# 1 to 8 from ladder, same as appeared in figure

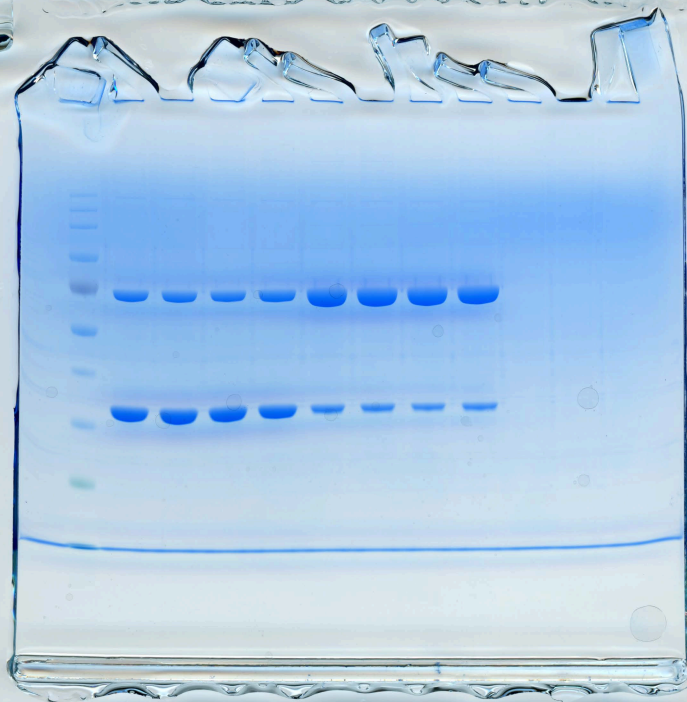

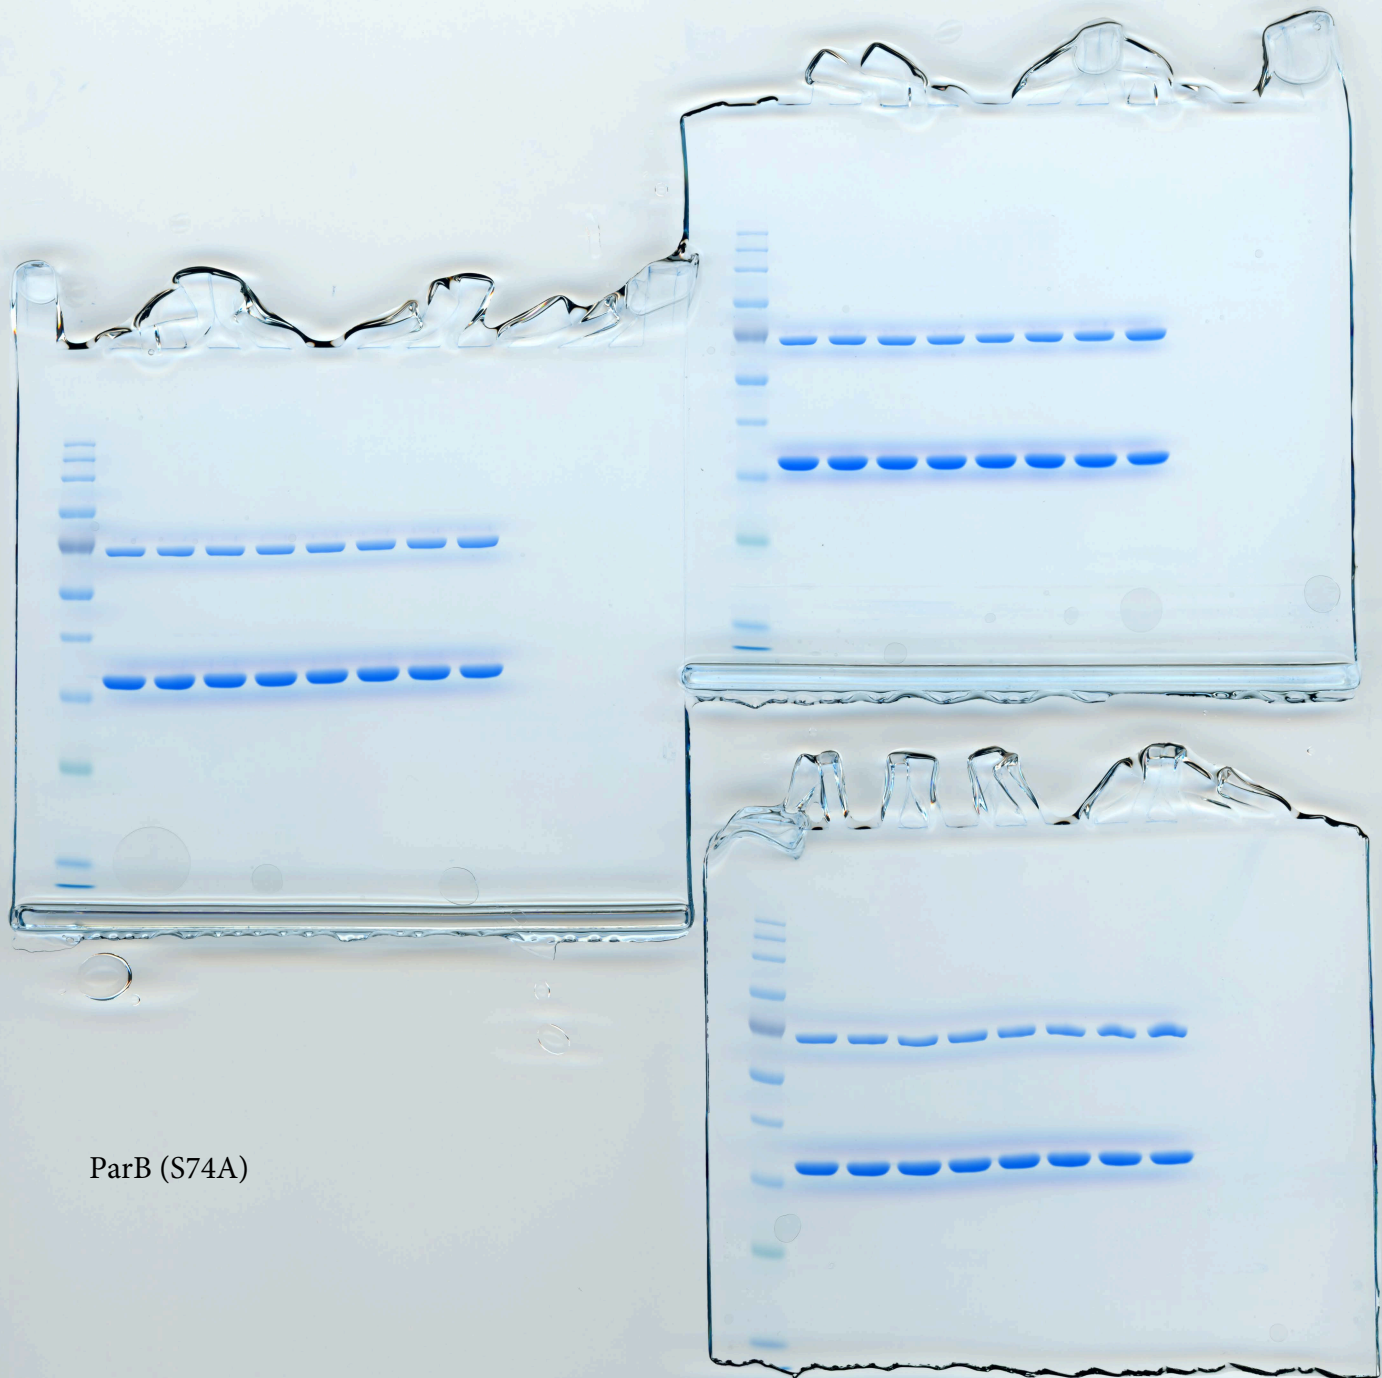

ParB (S74A)

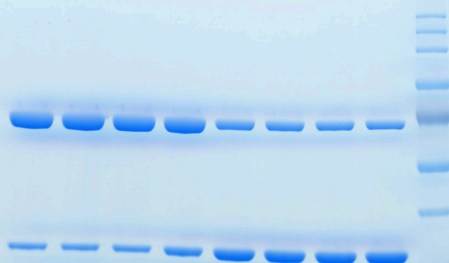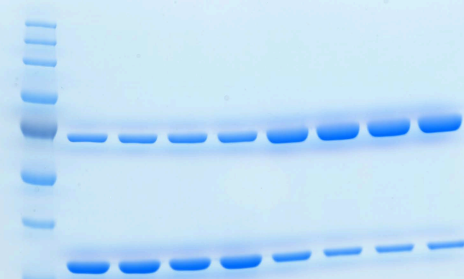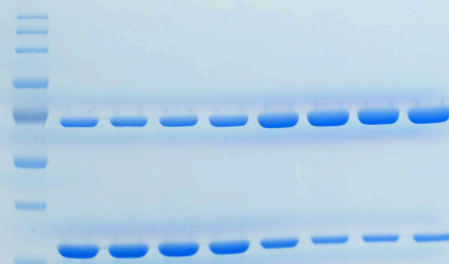

ParB (Q82A)



ParB (R139A)

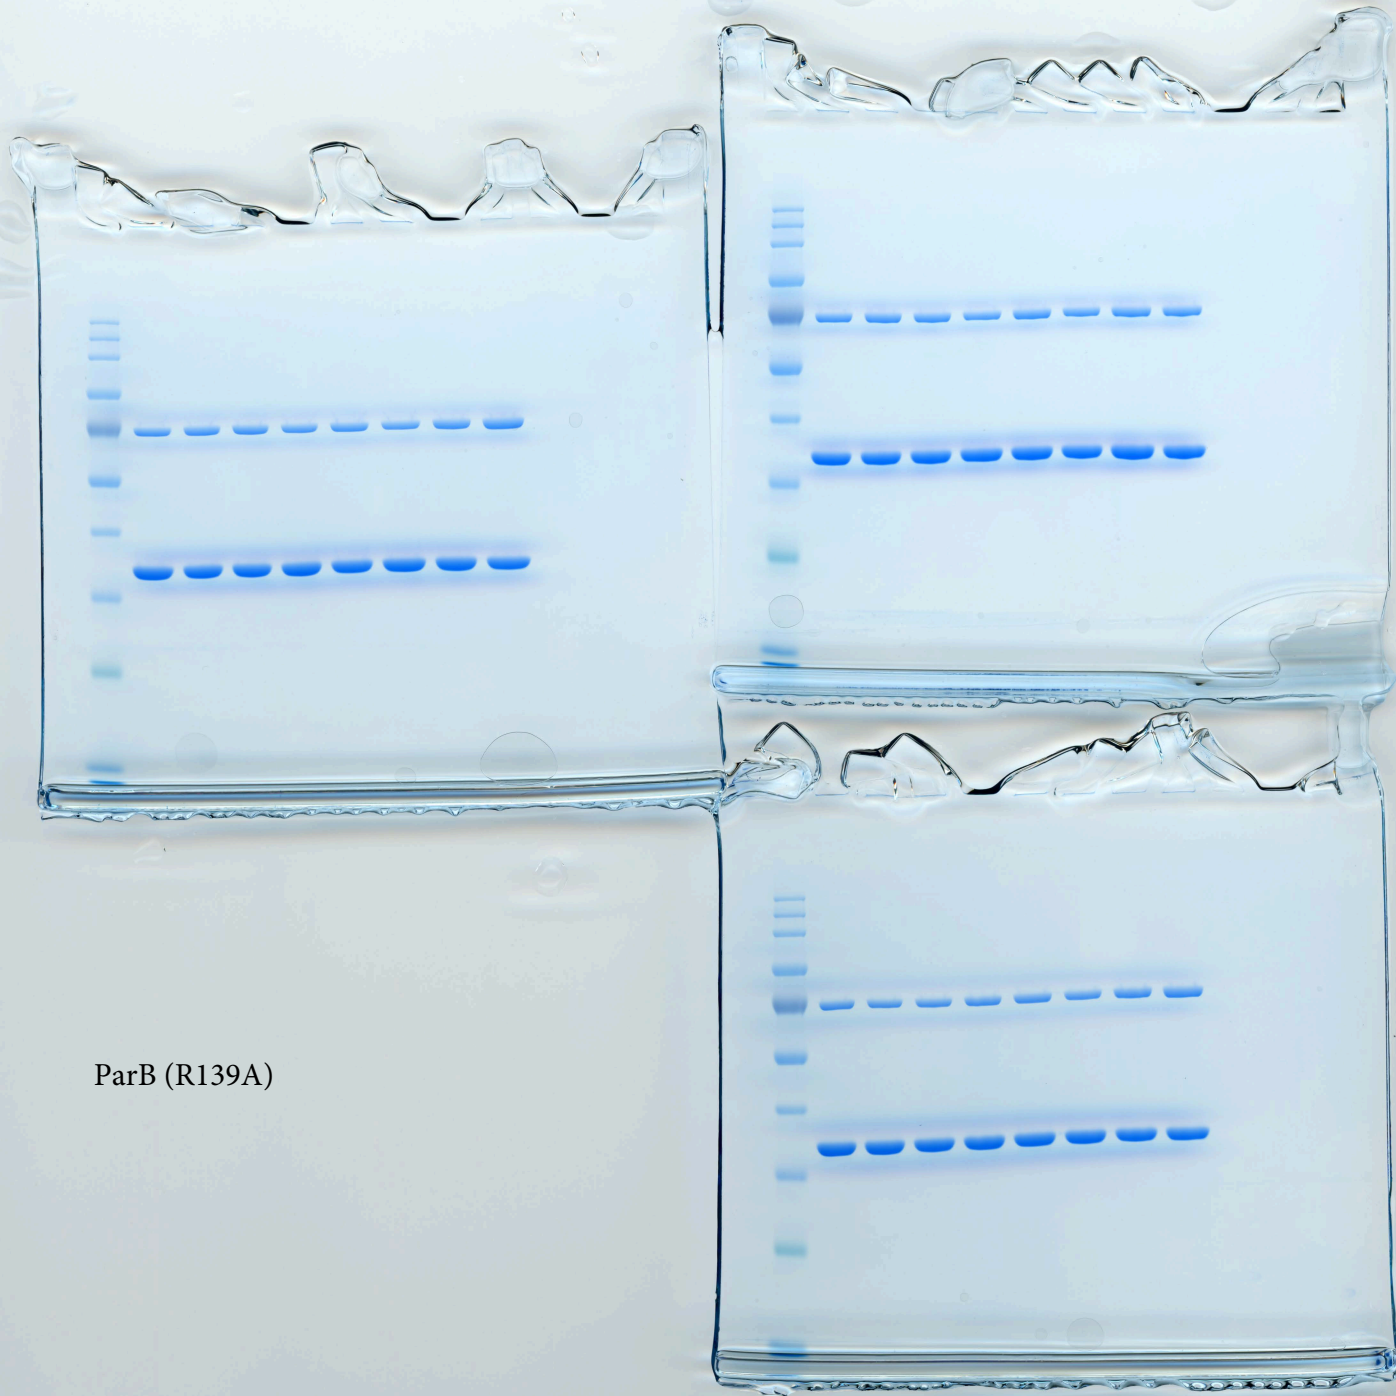

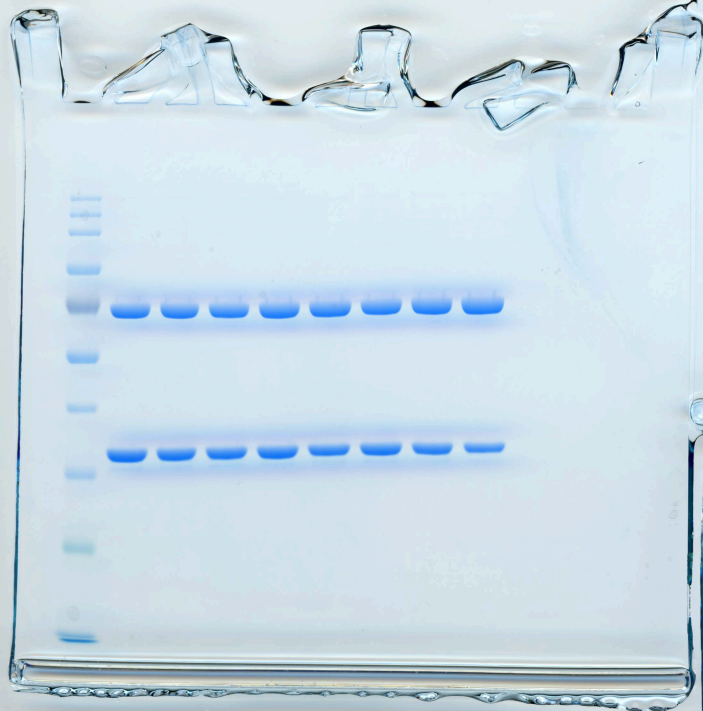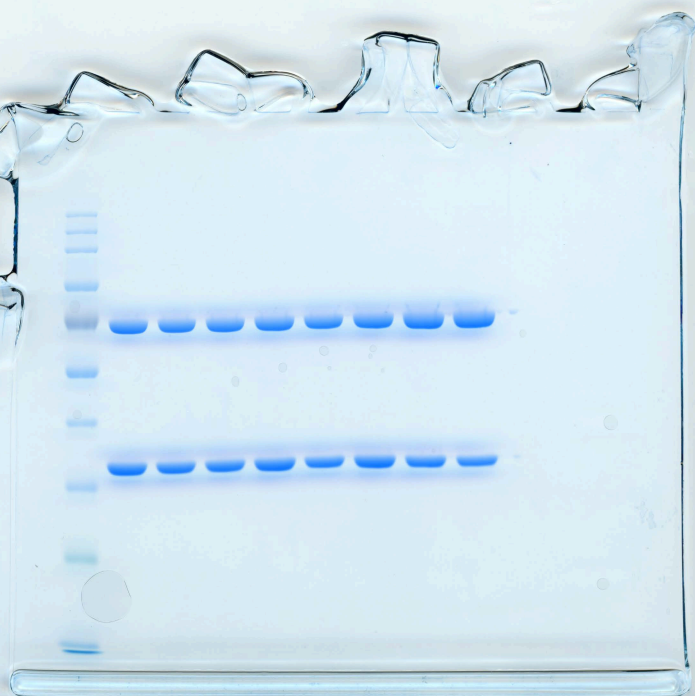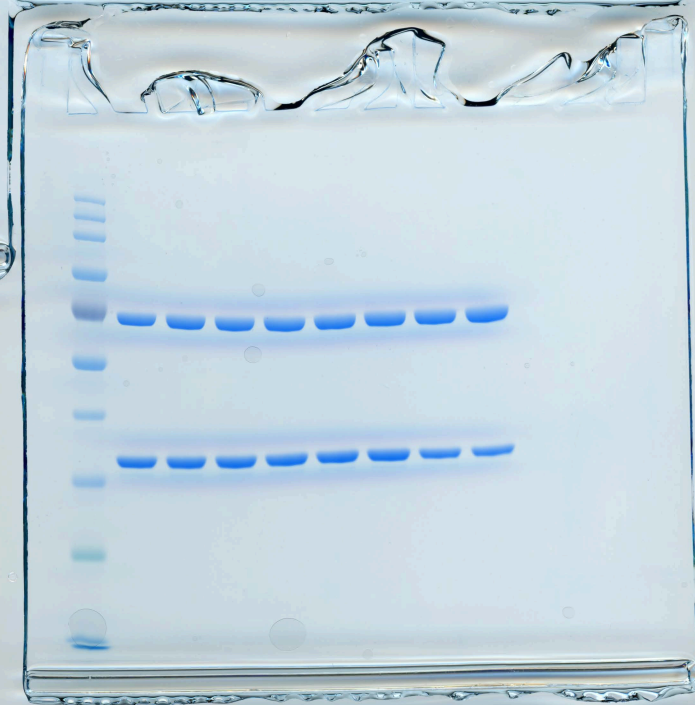

ParB (N136A)

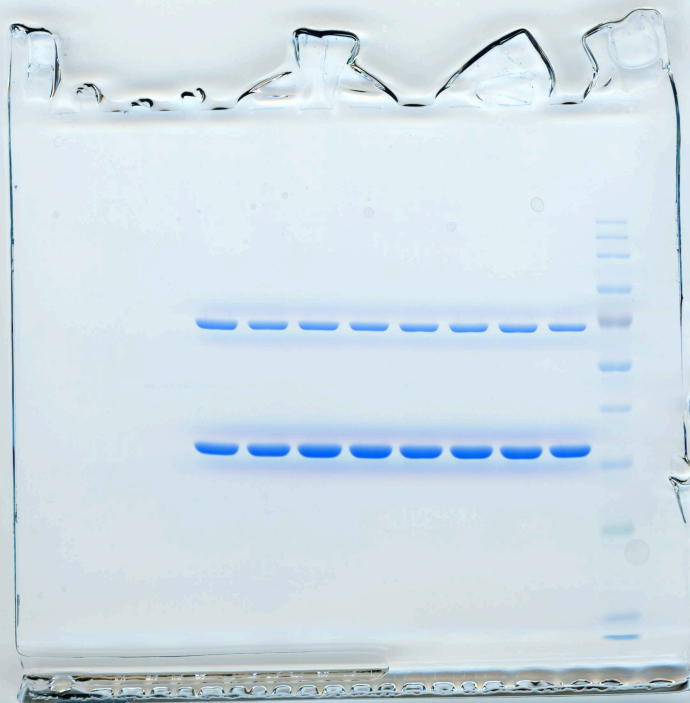

ParB (R103A)

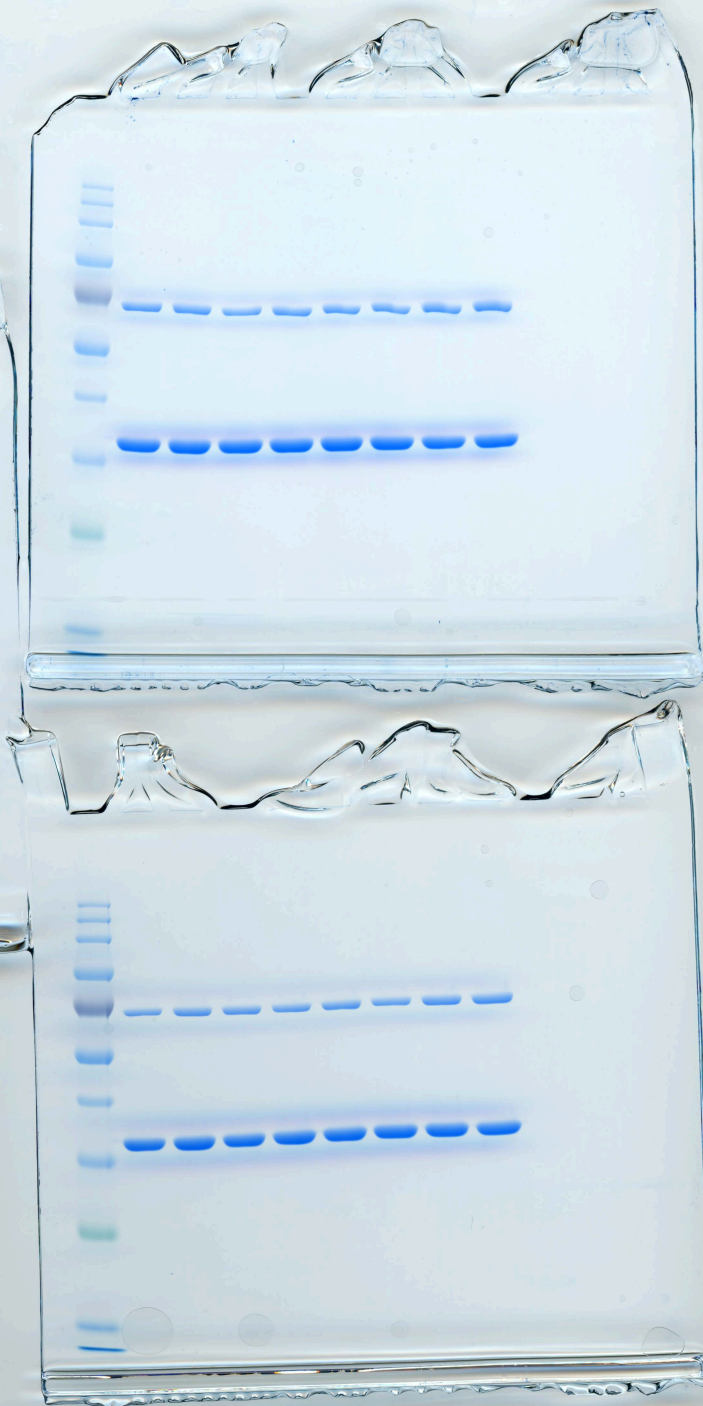



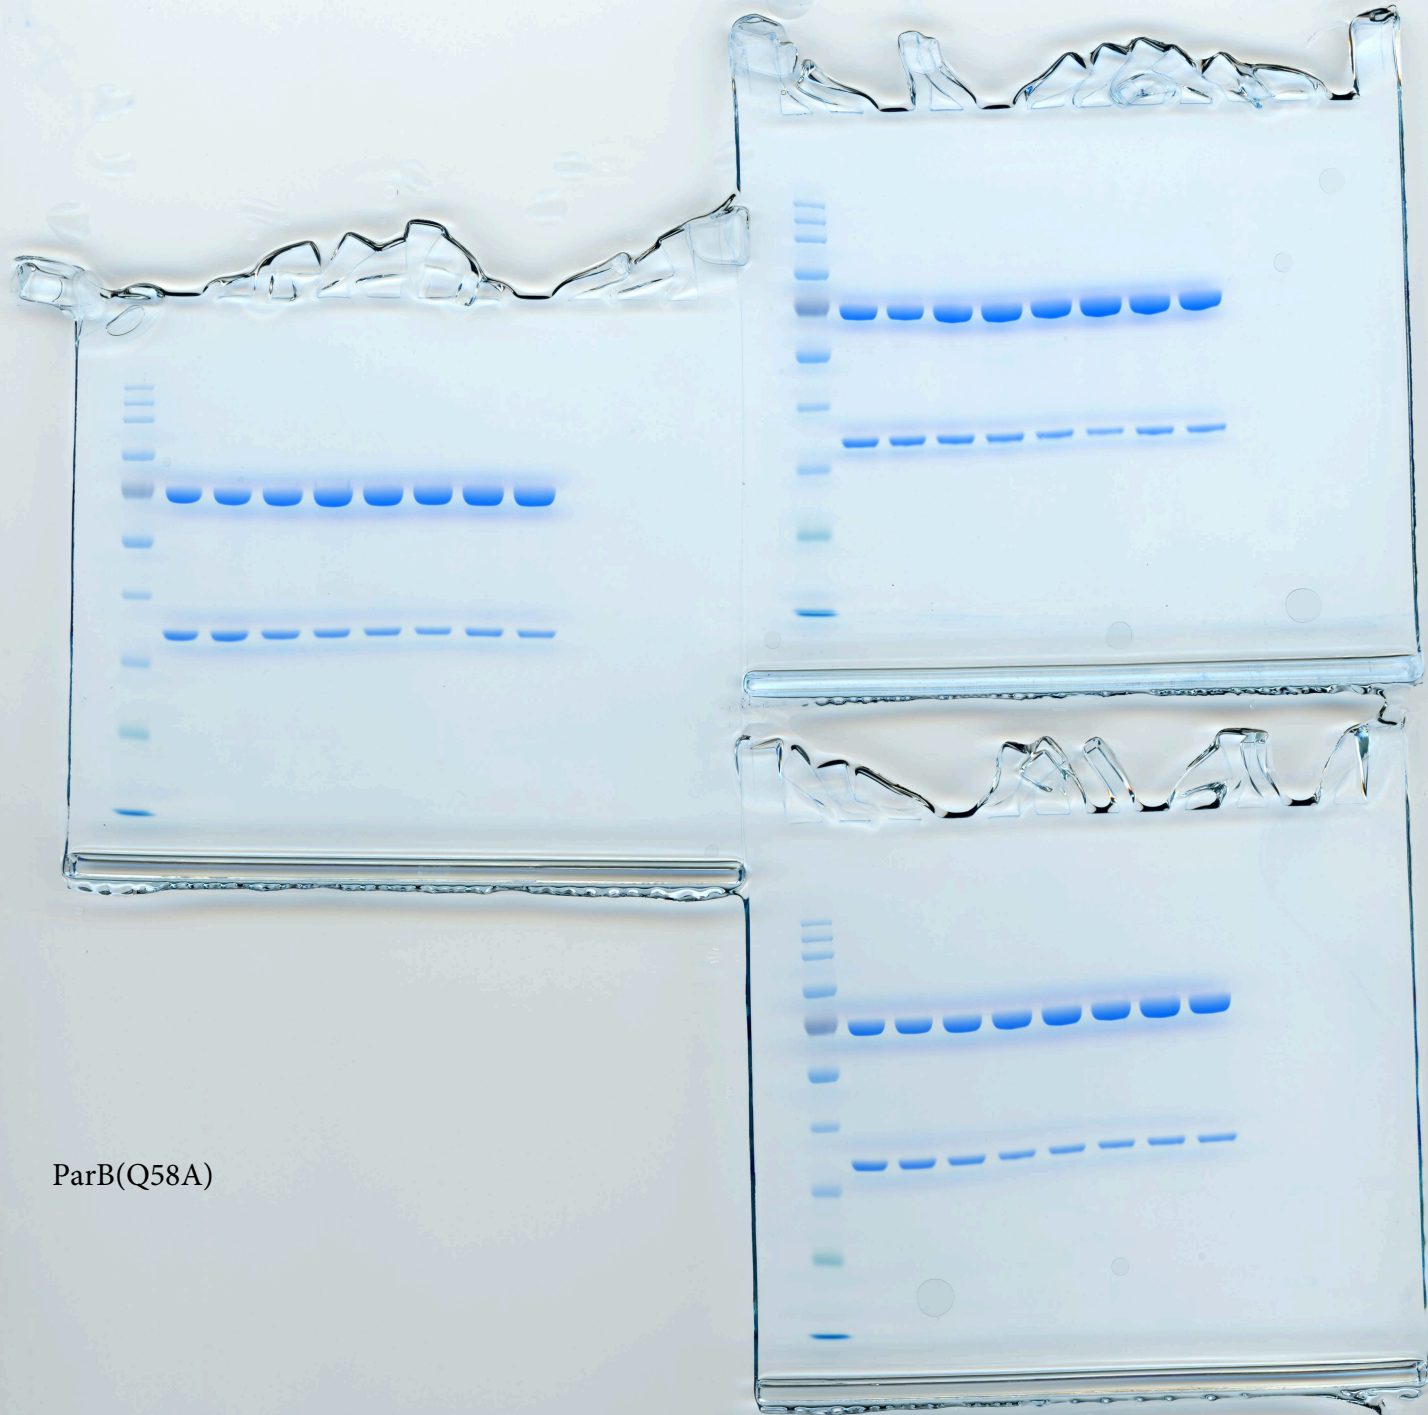

ParB(Q58A)

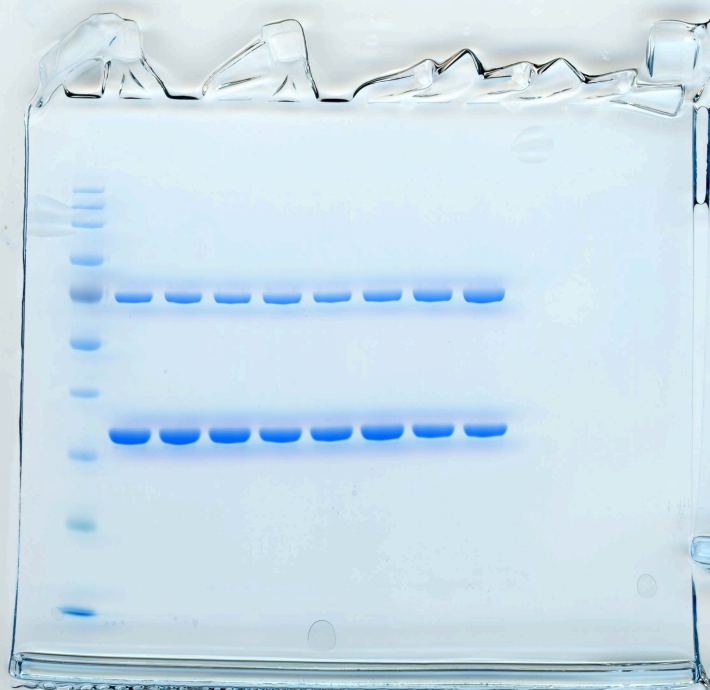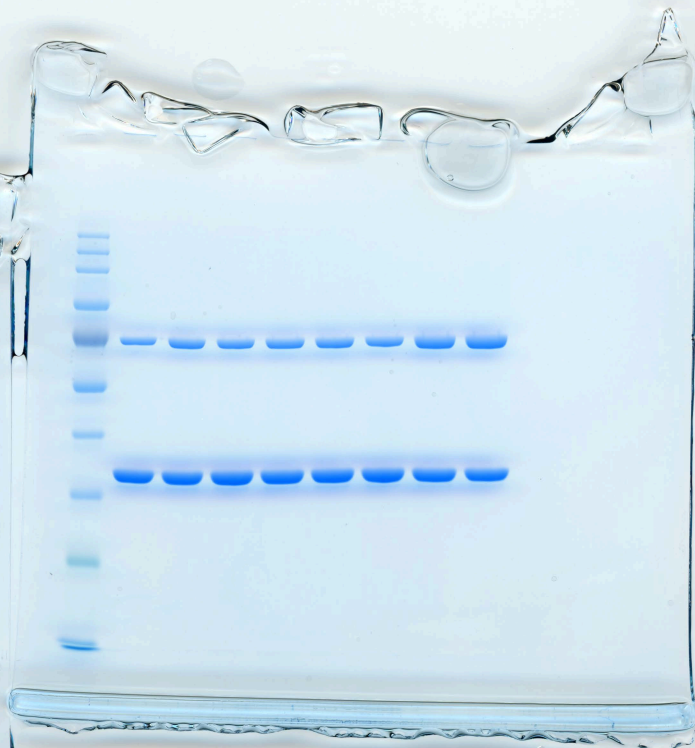

ParB (R60A)

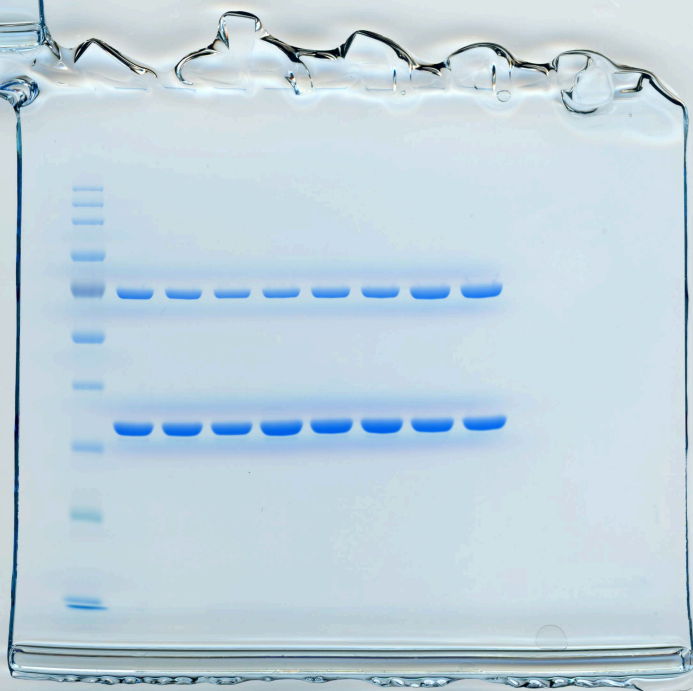



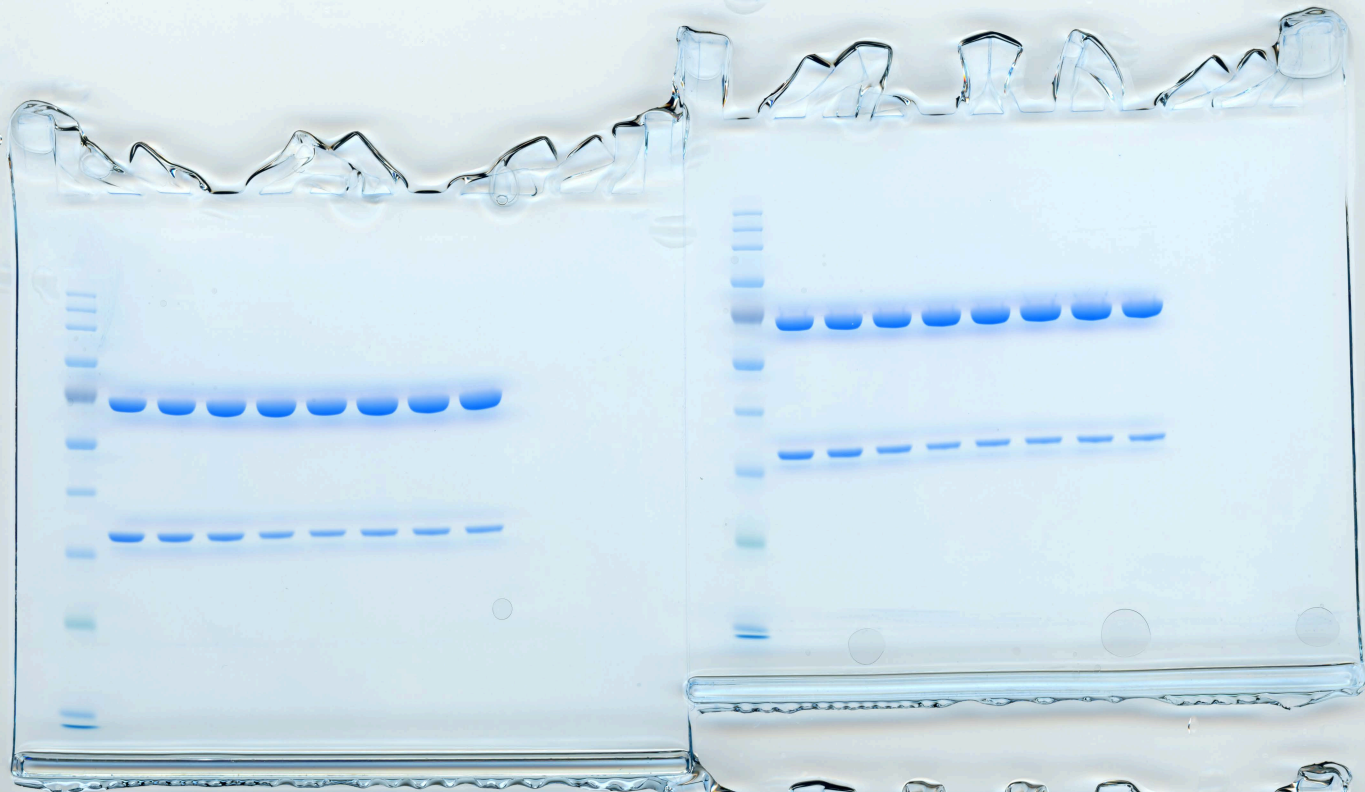

ParB (E135A)

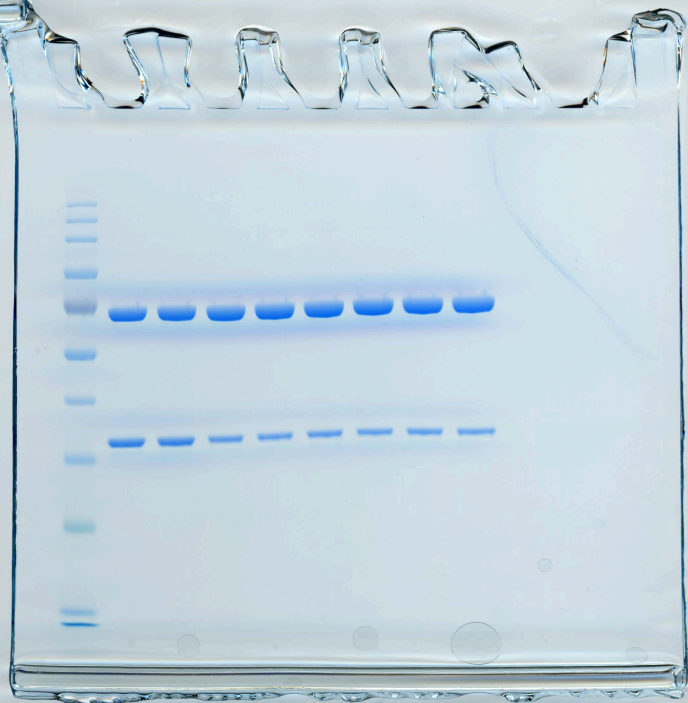

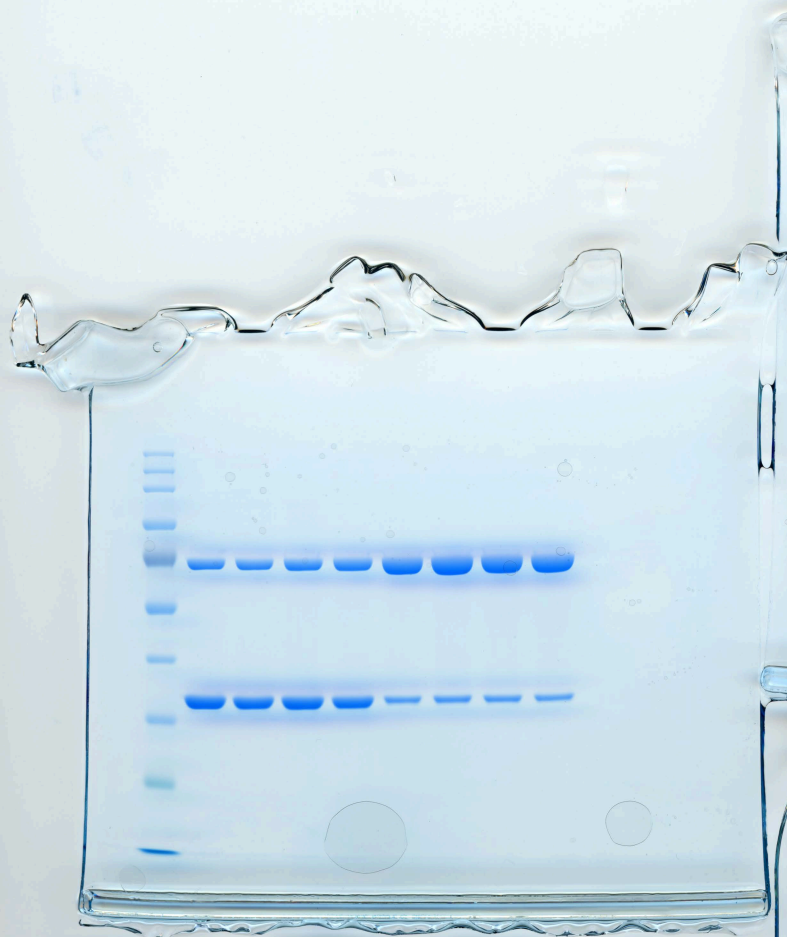

ParB(E102A)

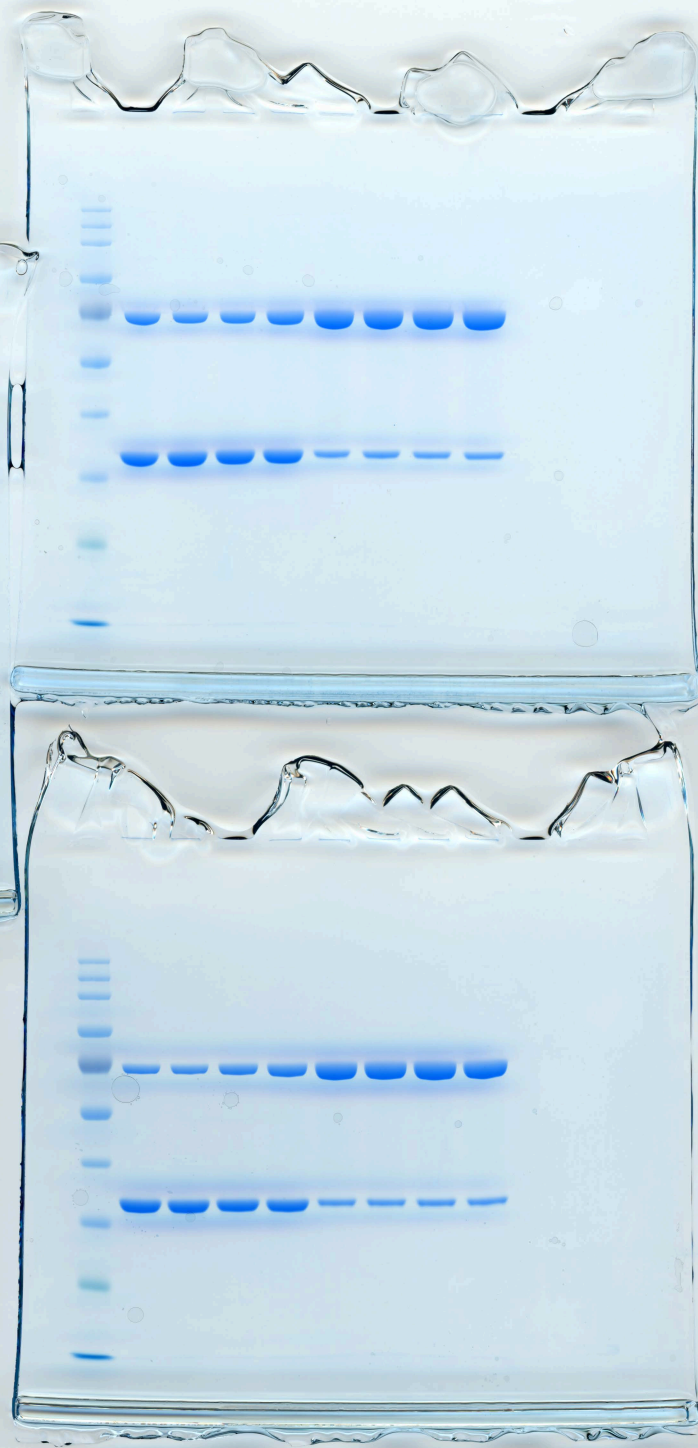

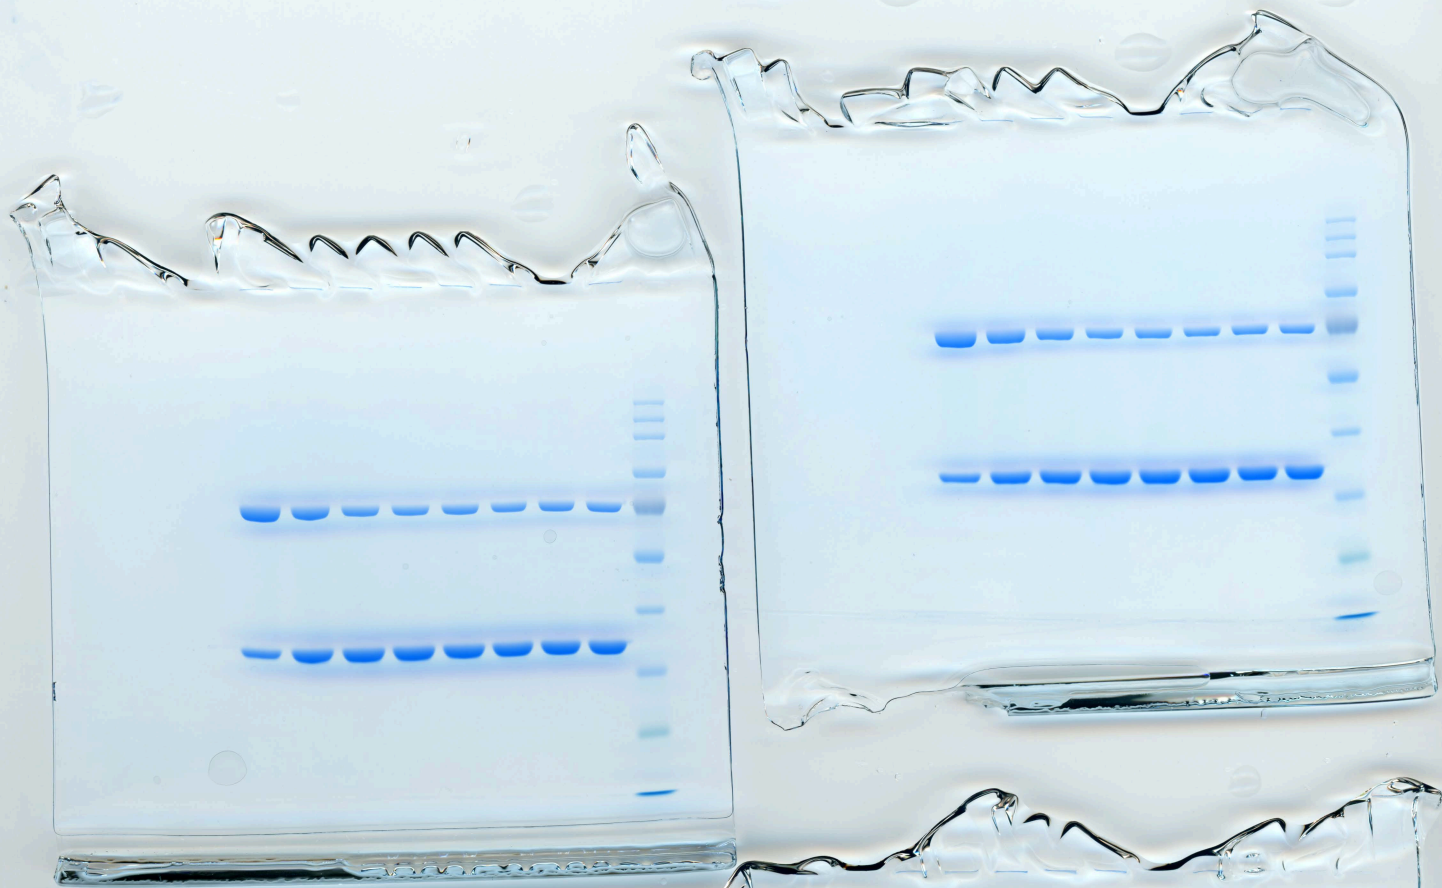

ParB(G79S)

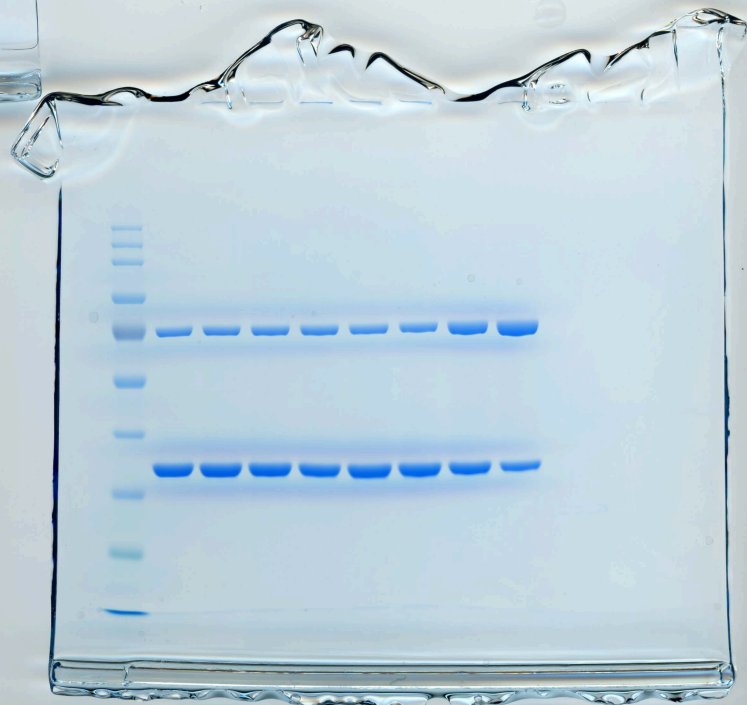



ParB (R104A)

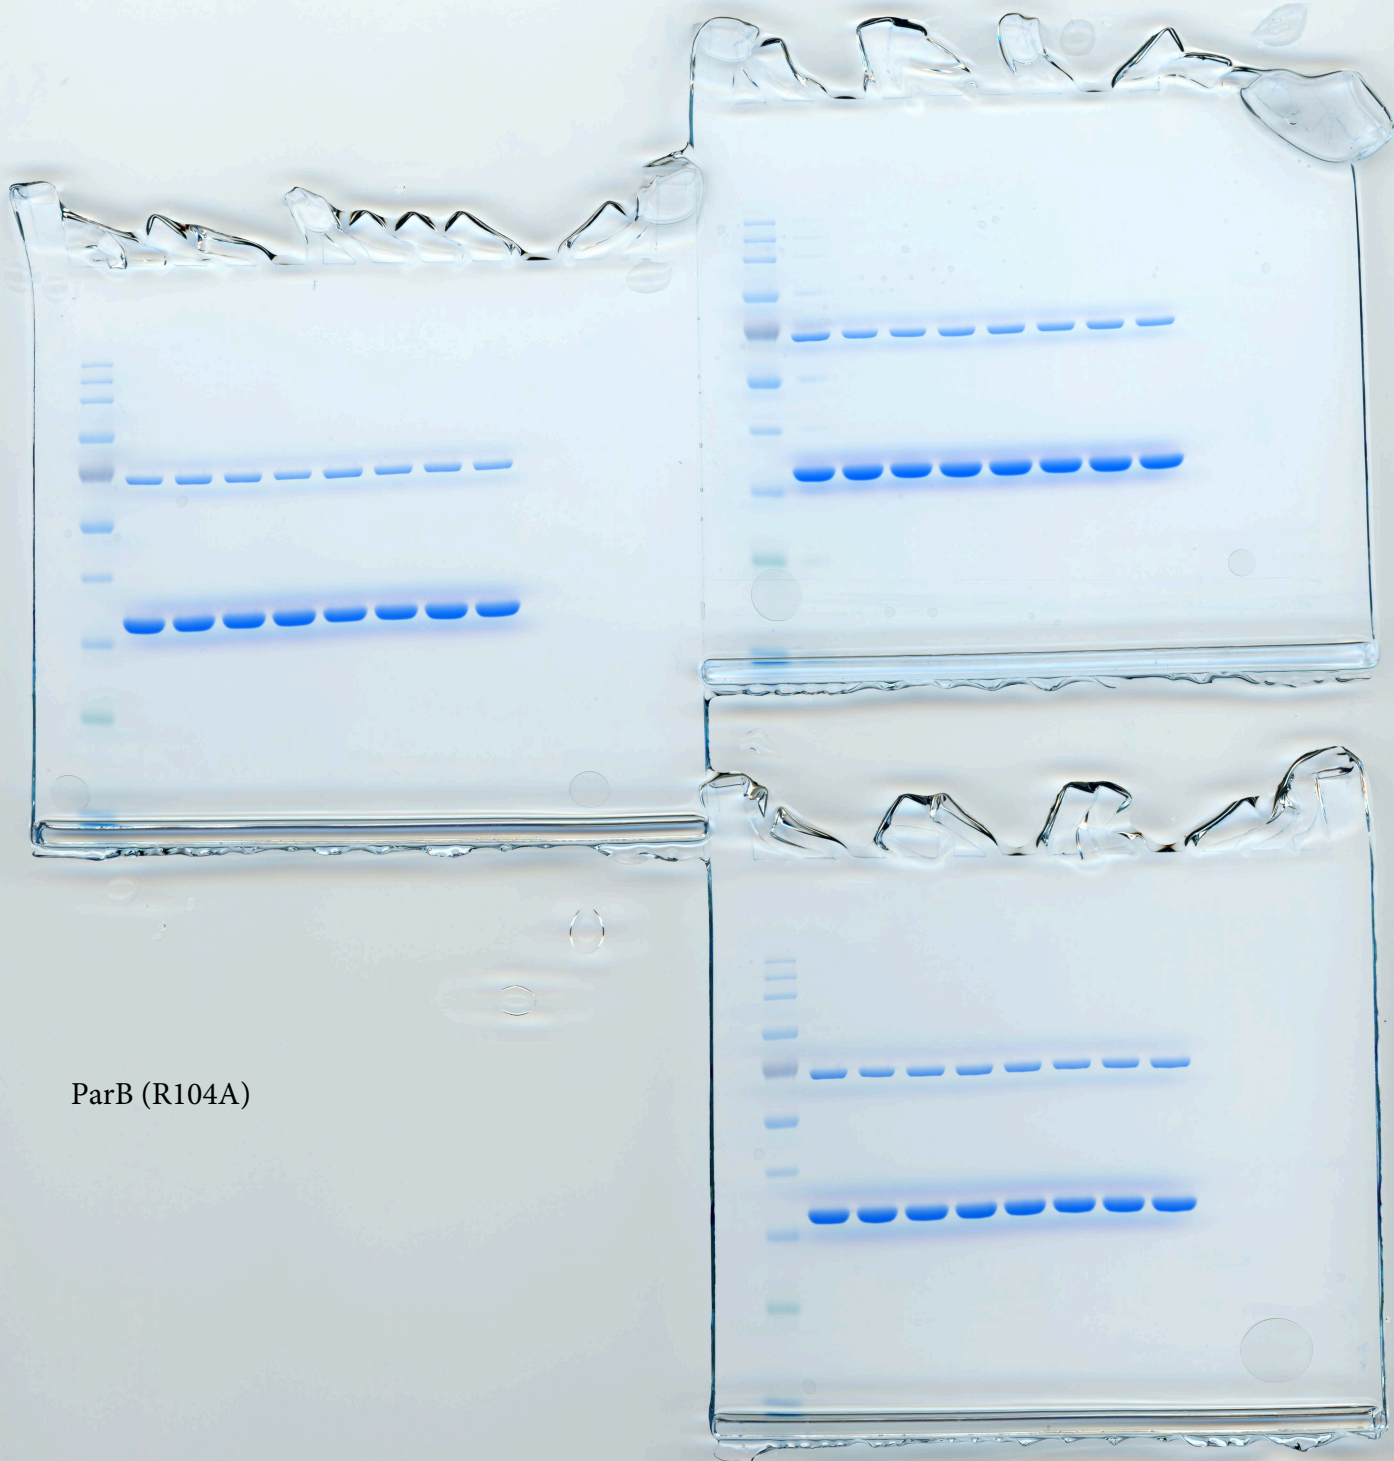

Supplement: fig6-figsupp1-data1 [file Annotation.pdf › Figure6_figure_supplement1/Annotation.pdf]
