# Supplementary material for: A CTP-dependent gating mechanism enables ParB spreading on DNA
Source: eLife journal article supplement (doi:10.7554/elife.69676), 2021-08-01

ParB (L224C)

ParB (I304C)

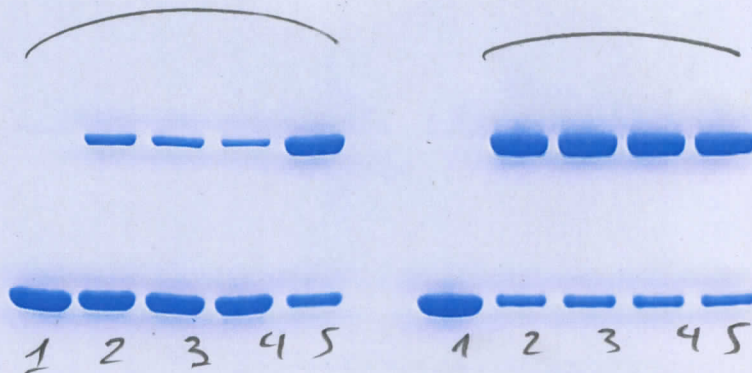

Lane #  
same as  
appeared  
in figure.

1 = - BMCE  
2 = + BMCE + Pr  
3 = + BMCE + Pr + CTP

4 = + BMCE + Pr + parS  
5 = + BMCE + Pr + parS + CTP

ParB (Q35C)

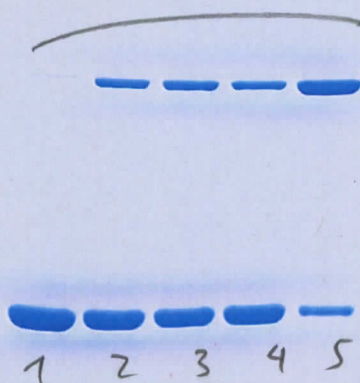

Supplement: fig5-data1 [file Annotation.pdf › Figure5/PanelB/Annotation.pdf]
