# Supplementary material for: A CTP-dependent gating mechanism enables ParB spreading on DNA
Source: eLife journal article supplement (doi:10.7554/elife.69676), 2021-08-01

XX —  
 X@35C —  
 X@304C —

P<sub>u</sub>B  
 (A 35C I 304C)

LANE 1 2 3 4 5 6 7 8 9 10 11 12

→ Same  
 as appeared  
 in  
 figure

12 11 10 9 8 7 6 5 4 3 2 1

Lane # : same as appeared  
in figure

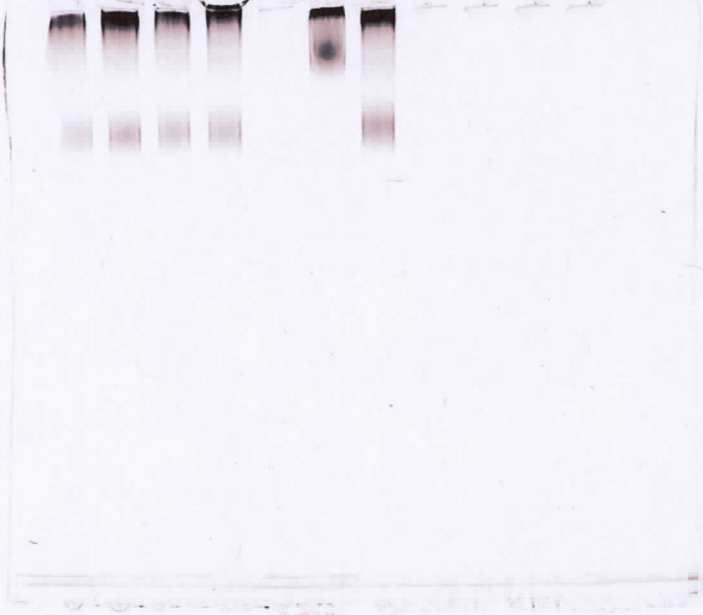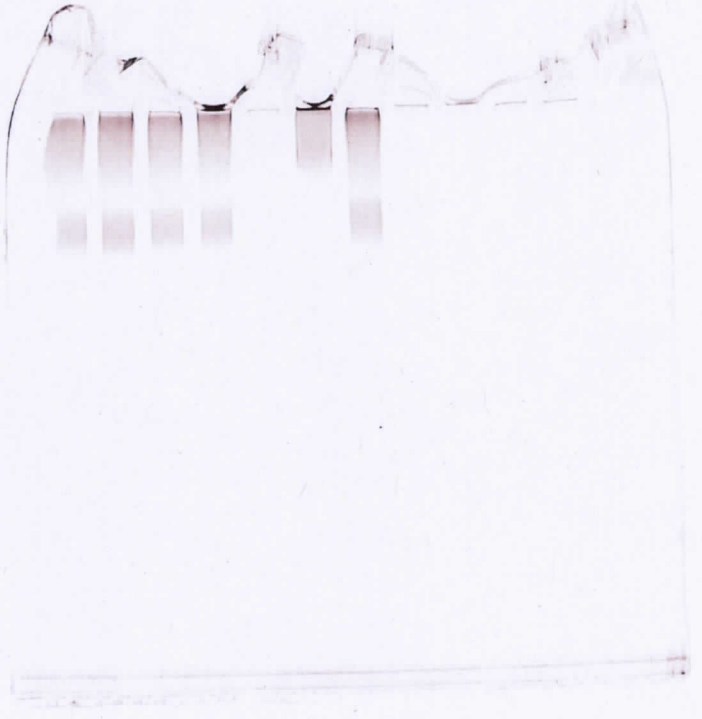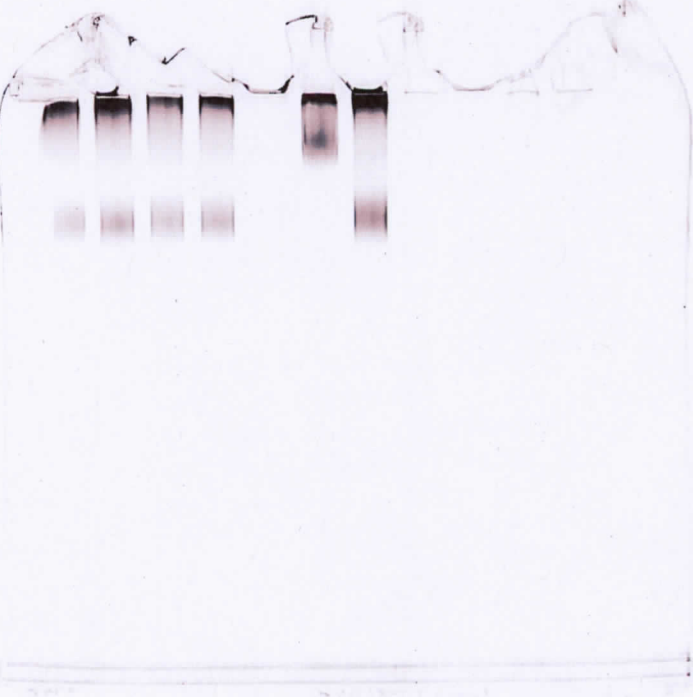

Lane # 6 7 9 10 11 12  
same as appeared in figure.

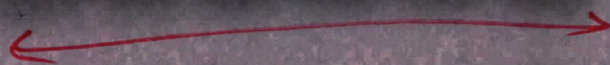

Supplement: fig5-data1 [file Annotation.pdf › Figure5/PanelC/Annotation.pdf]
