# Supplementary material for: A CTP-dependent gating mechanism enables ParB spreading on DNA
Source: eLife journal article supplement (doi:10.7554/elife.69676), 2021-08-01
Supplement: fig5-data1 [file ParB_X1_I294C_L214C_quantified.xlsx]

## Sheet: Sheet1
	Xlink rep1	Xlink rep2	Xlink rep3	Xlink fraction (%)	STDEV
I304C	2.58159	3.18646	1.82543	2.53116	0.681914
I304C	75.9045	70.1091	71.0963	72.37	3.10056
I304C	74.1887	67.0298	70.4815	70.5667	3.58021
I304C	73.5294	68.3383	70.58	70.8159	2.60357
I304C	77.368	69.8379	70.6298	72.6119	4.13791
	Xlink rep1	Xlink rep2	Xlink rep3	Xlink fraction (%)	STDEV
L224C	1.69337	-0.570739	0.417604	0.513413	1.13509
L224C	32.9184	37.4821	32.8261	34.4089	2.66191
L224C	33.7769	35.1029	34.611	34.4969	0.670319
L224C	28.6441	33.1412	25.1511	28.9788	4.00553
L224C	77.8269	75.6098	79.0503	77.4956	1.74401
	Xlink rep1	Xlink rep2	Xlink rep3	Xlink fraction (%)	STDEV
Q35C	1.92004	3.94959	0.855239	2.24162	1.57204
Q35C	18.7879	31.3043	17.3611	22.4844	7.6715
Q35C	22.9056	28.4061	24.9113	25.4077	2.7836
Q35C	17.1574	17.8707	19.2691	18.0991	1.07423
Q35C	67.3171	58.8462	61.1395	62.4342	4.38137
