# Supplementary material for: A CTP-dependent gating mechanism enables ParB spreading on DNA
Source: eLife journal article supplement (doi:10.7554/elife.69676), 2021-08-01
Supplement: fig5-figsupp3-data1 [file elife-69676-fig5-figsupp3-data1-v1.zip]

Pub (L224C T344C)

X~~304C~~  
X~~214C~~

Pub  
(L224C  
T344C)

lane 1 2 3 4 5 6 7 8 →

lane 4 is appeared in figure
