# Supplementary material for: A CTP-dependent gating mechanism enables ParB spreading on DNA
Source: eLife journal article supplement (doi:10.7554/elife.69676), 2021-08-01
Supplement: fig5-figsupp3-data1 [file elife-69676-fig5-figsupp3-data1-v1.zip]

Figure 5-  
figure supp 3  
(B)

Lanes # 1 2 3 4 5 6 7 9 ← as in figure

Lanes # 1 2 3 4 5 6 7 9 ← as in figure
