# Supplementary material for: A CTP-dependent gating mechanism enables ParB spreading on DNA
Source: eLife journal article supplement (doi:10.7554/elife.69676), 2021-08-01
Supplement: fig5-figsupp3-data1 [file elife-69676-fig5-figsupp3-data1-v1.zip]

P<sub>W</sub>B(1224C I304C)-TEU

Lane #  
as appeared  
in figure.

LANE

1 2 3 4 5 6 7 8 9 10 11 12
