# Supplementary material for: A CTP-dependent gating mechanism enables ParB spreading on DNA
Source: eLife journal article supplement (doi:10.7554/elife.69676), 2021-08-01
Supplement: fig6-data1 [file BLI_quantification.xlsx]

## Sheet: Sheet1
[CTP]	WT	mut1 S74A	mut2 Q82A	mut3 R139A	mut4 N136A	mut5 R103A	mut7 Q58A	mut10 R60A	mut11 E135A	mut13 E102A	mut14 G79S	R104A
0	0.764	0.966	0.772	0.87	0.83	0.709	0.443	0.757	0.763	0.961	0.969	0.83
0	0.874	0.885	0.857	0.848	0.806	0.564	0.488	0.728	0.768	0.985	0.993	0.969
0	0.921	0.79	0.842	0.912	0.769	0.764	0.488	0.699	0.733	0.906	0.942	0.88
1	0.769	0.774	0.836	0.808	0.82	0.738	0.484	0.768	0.957	0.972	0.951	0.796
1	0.822	0.866	0.842	0.816	0.879	0.604	0.478	0.753	0.917	0.95	0.992	0.836
1	0.837	0.827	0.858	0.833	0.781	0.686	0.445	0.728	1.066	0.978	0.975	0.82
5	0.87	0.758	0.853	0.801	0.811	0.751	0.46	0.804	1.043	0.993	0.938	0.811
5	0.944	0.869	0.837	0.827	0.842	0.606	0.498	0.694	0.995	1.076	0.926	0.841
5	0.89	0.802	0.877	0.833	0.78	0.742	0.523	0.776	1.013	1.081	0.949	0.852
10	0.944	0.787	0.908	0.81	0.834	0.724	0.51	0.767	1.1	1.218	0.963	0.864
10	1.086	0.842	0.874	0.817	0.851	0.578	0.526	0.694	1.221	1.245	0.977	0.91
10	1.018	0.779	0.909	0.873	0.779	0.684	0.525	0.694	1.128	1.238	0.974	0.85
50	2.05	0.791	1.711	0.732	0.843	0.696	0.763	0.765	1.565	2.376	1	0.814
50	2.008	0.862	1.943	0.822	0.868	0.582	0.841	0.688	1.399	2.559	0.992	0.907
50	1.973	0.801	1.772	0.878	0.797	0.669	0.827	0.672	1.491	2.476	0.936	0.844
100	2.41	0.81	2.234	0.813	0.821	0.699	0.873	0.738	1.481	3.16	1.032	0.781
100	2.424	0.845	2.287	0.821	0.82	0.616	1.075	0.683	1.628	3.149	1.019	0.833
100	2.517	0.8	2.311	0.844	0.793	0.688	1.027	0.681	1.632	3.1	1.006	0.831
500	3.501	1.003	3.445	0.833	0.814	0.724	1.51	0.812	1.53	3.571	1.531	0.804
500	3.57	1.059	3.448	0.845	0.845	0.611	1.505	0.793	1.576	3.37	1.542	0.833
500	3.722	1.006	3.447	0.883	0.745	0.729	1.526	0.792	1.607	3.432	1.514	0.844
1000	3.562	1.192	3.642	0.785	0.842	0.766	1.681	0.836	1.475	3.616	2.004	0.833
1000	3.8	1.321	3.62	0.789	0.861	0.62	1.712	0.716	1.425	3.199	2.004	0.836
1000	3.705	1.266	3.703	0.851	0.73	0.787	1.67	0.74	1.521	3.295	1.999	0.794
wavelength shift (nm)
[CTP] uM	WT	mut1 S74A	mut2 Q82A	mut3 R139A	mut4 N136A	mut5 R103A	mut7 Q58A	mut10 R60A	mut11 E135A	mut13 E102A	mut14 G79S	R104A	MEAN
0	0.853	0.880333	0.823667	0.876667	0.801667	0.679	0.473	0.728	0.754667	0.950667	0.968	0.893
1	0.809333	0.822333	0.845333	0.819	0.826667	0.676	0.469	0.749667	0.98	0.966667	0.972667	0.817333
5	0.901333	0.809667	0.855667	0.820333	0.811	0.699667	0.493667	0.758	1.017	1.05	0.937667	0.834667
10	1.016	0.802667	0.897	0.833333	0.821333	0.662	0.520333	0.718333	1.14967	1.23367	0.971333	0.874667
50	2.01033	0.818	1.80867	0.810667	0.836	0.649	0.810333	0.708333	1.485	2.47033	0.976	0.855
100	2.45033	0.818333	2.27733	0.826	0.811333	0.667667	0.991667	0.700667	1.58033	3.13633	1.019	0.815
500	3.59767	1.02267	3.44667	0.853667	0.801333	0.688	1.51367	0.799	1.571	3.45767	1.529	0.827
1000	3.689	1.25967	3.655	0.808333	0.811	0.724333	1.68767	0.764	1.47367	3.37	2.00233	0.821
[CTP]	WT	mut1 S74A	mut2 Q82A	mut3 R139A	mut4 N136A	mut5 R103A	mut7 Q58A	mut10 R60A	mut11 E135A	mut13 E102A	mut14 G79S	R104A	STD
0	0.0805792	0.0880928	0.0453689	0.0325167	0.03073	0.10332	0.0259808	0.029	0.0189297	0.040501	0.0255147	0.070406
1	0.0357258	0.0461772	0.0113725	0.0127671	0.049339	0.0675574	0.021	0.0202073	0.0771168	0.0147422	0.0205994	0.0201329
5	0.0382797	0.0558957	0.0201329	0.0170098	0.031	0.0812424	0.0317228	0.0571664	0.0242487	0.0494267	0.0115036	0.0212211
10	0.0710211	0.0342977	0.0199249	0.0345302	0.0376342	0.0754453	0.00896289	0.0421466	0.063343	0.0140119	0.00737111	0.03139
50	0.038553	0.0384318	0.120268	0.0736569	0.0360139	0.0595735	0.0415853	0.0497226	0.0831625	0.0916315	0.0348712	0.0474658
100	0.0581578	0.0236291	0.0393997	0.0160935	0.015885	0.0450814	0.105534	0.0323471	0.0860484	0.0319427	0.013	0.0294618
500	0.113068	0.0315013	0.00152753	0.0261024	0.0511892	0.0667308	0.0109697	0.0112694	0.0387427	0.102929	0.0141067	0.020664
1000	0.119804	0.0647328	0.043	0.0370045	0.0707884	0.0909634	0.0217792	0.063498	0.0480139	0.218383	0.00288675	0.0234307
