# Supplementary material for: A CTP-dependent gating mechanism enables ParB spreading on DNA
Source: eLife journal article supplement (doi:10.7554/elife.69676), 2021-08-01
Supplement: fig6-data1 [file CTP_hydrolysis_quantification.xlsx]

## Sheet: Summary
CTCPase rate or CTP per ParB molecule per hour
Average														STD
[CTP] nM	WT	S74A	Q82A	R139A	N136A	R103A	Q58A	R60A	E135A	E102A	G79S	R104A		[CTP] nM	WT	S74A	Q82A	R139A	N136A	R103A	Q58A	R60A	E135A	E102A	G79S	R104A
0	0	0	0	0	0	0	0	0	0	0	0	0			0	0	0	0	0	0	0	0	0	0	0	0
1	-0.0966	-0.0414	0.0828	0.0138	0.0552	0.0414	-0.0276	-0.069	-0.0414	-0.0414	0	-0.0276			0.31073	0.180458	0.0414	0.172362	0.104188	0.0828	0.109534	0.361707	0.0239023	0.212448	0.0239023	0.0414
5	-0.0276	-0.0828	0.3312	0.0276	0.0828	-0.0138	-0.069	-0.1518	-0.0966	0.0414	0.138	-0.0276			0.271478	0.14927	0.14927	0.195649	0.518741	0.126479	0.0828	0.271478	0.0828	0.497375	0.275655	0.316198
10	0.2622	-7.18176e-16	0.414	0.0138	0.0276	-1.50817e-15	0.0138	-0.0276	0.0552	0.1518	0.0552	-0.0414			0.424897	0.172362	0.0828	0.126479	0.0632395	0.133082	0.109534	0.167316	0.119512	0.14927	0.0717069	0.0239023
50	2.415	0.0552	2.7324	0.0552	0.138	0.0966	-0.0552	-0.0552	0.0138	0.1518	0.3312	-0.069			0.47625	0.189719	0.189719	0.195649	0.293716	0.156738	0.145392	0.119512	0.126479	0.258543	0.133082	0.0632395
100	5.3268	0.1794	5.3682	0.0552	0.069	0.0276	-0.0828	-0.138	-0.0828	0.1242	0.5934	-0.0276			0.358535	0.126479	0.126479	0.086181	0.488099	0.086181	0.133082	0.228013	0.0414	0.606101	0.394931	0.375654
500	5.9478	3.6294	6.1824	0.0828	0.138	0.2208	0.0138	-0.0414	0.0966	0.3864	4.4574	-0.0138			0.497375	0.393482	0.172362	0.2898	0.133082	0.186683	0.186683	0.252958	0.271478	0.219068	0.0478046	0.1242
1000	5.175	5.175	5.3544	0.3174	0.1656	0.3312	-0.0552	-0.069	-0.0138	0.2484	5.0784	-0.0828			0.0956092	0.356937	0.293716	0.204221	0.312563	0.252958	0.133082	0.0956092	0.228013	0.334632	0.119512	0.258543
