# Supplementary material for: A CTP-dependent gating mechanism enables ParB spreading on DNA
Source: eLife journal article supplement (doi:10.7554/elife.69676), 2021-08-01
Supplement: fig6-data1 [file DRaCALA_quantification.xlsx]

## Sheet: Total
	fraction bound (%)	RAW
	rep1	WT	S74A	Q82A	R139A	N136A	R103A	Q58A	R60A	E135A	E102A	G79S	R104A
		14.5132	0.701587	18.2071	2.56161	0.17087	4.11906	9.94325	1.92903	26.5913	23.188	3.30893	0.132115
		4.42116	-0.459509	10.7384	0.41648	-1.83763	0.996877	3.64541	-0.0353493	11.6713	9.84926	0.696735	-0.69362
		1.99923	-2.25166	4.58569	-2.0361	-2.12729	-1.17523	0.315269	-0.818101	3.70424	3.16744	-1.51823	-1.67412
		0.152246	-2.38862	-0.0917188	-2.40622	-2.81845	-1.53194	0.175997	-1.91286	0.384593	-0.317401	-2.07223	-1.71208
		-0.678684	-2.68929	-1.11821	-3.97874	-0.983247	-1.644	0.185566	-2.066	-1.7991	-1.13046	-2.06785	-1.52428
	rep1	Fraction	Fraction	Fraction	Fraction	Fraction	Fraction	Fraction	Fraction	Fraction	Fraction	Fraction	Fraction
		11.4612	-0.860836	12.3317	0.722055	-0.604679	0.080065	10.0097	-1.65445	27.8368	26.2166	2.92175	-1.60078
		4.50571	-1.10268	7.1695	-1.42376	-1.30247	-0.353997	2.94676	-2.59626	10.611	11.4753	1.88341	-2.27596
		-0.17473	-2.35664	2.78444	-2.38736	-2.20203	-1.99736	-1.23546	-2.50914	2.75469	2.85912	0.945108	-2.91566
		-2.18559	-2.34323	-0.574378	-3.4697	-3.51604	-2.78216	-2.68089	-3.25938	-1.59703	-0.593166	-1.13555	-2.61775
		-3.73998	-0.921923	-1.42698	-4.01588	-3.40495	-1.59566	-3.74505	-3.27191	-1.99825	-0.976107	-0.8949	-2.97466
	rep3	Fraction	Fraction	Fraction	Fraction	Fraction	Fraction	Fraction	Fraction	Fraction	Fraction	Fraction	Fraction
		12.6985	1.72703	14.6135	1.22153	1.57534	0.767902	9.73868	2.1407	23.0143	23.3819	3.45784	-1.34278
		7.06864	-1.06783	8.12332	0.357224	1.1506	-0.148661	3.36971	-0.241096	12.08	10.7273	0.781902	-1.01253
		2.0831	-1.31704	3.40521	-0.734513	-0.101627	-0.513817	0.491835	-1.42249	4.79914	4.17418	0.418651	-1.06606
		-0.00192342	-1.08706	0.208599	-1.18471	-0.412375	-1.21235	-0.292415	-0.974341	0.959712	0.70831	-0.542497	-0.472761
		-0.21701	0.372149	-0.738795	-1.90052	-1.24856	-1.07403	-1.20459	0.406243	-0.372055	-0.716111	-1.00472	-1.34108
		Average
	[ParB] uM	WT	S74A	Q82A	R139A	N136A	R103A	Q58A	R60A	E135A	E102A	G79S	R104A
	12.5	12.8909	0.522593	15.0507	1.50173	0.380509	1.65568	9.89721	0.805097	25.8141	24.2622	3.22951	-0.937149
	6.25	5.33184	-0.876672	8.67706	-0.216686	-0.663168	0.164739	3.32063	-0.957567	11.4541	10.684	1.12068	-1.32737
	3.125	1.30253	-1.97511	3.59178	-1.71932	-1.47698	-1.2288	-0.142786	-1.58324	3.75269	3.40025	-0.0514892	-1.88528
	1.5625	-0.678422	-1.93964	-0.152499	-2.35354	-2.24895	-1.84215	-0.932437	-2.04886	-0.0842417	-0.0674191	-1.25009	-1.60086
	0.78125	-1.54522	-1.07969	-1.09466	-3.29838	-1.87892	-1.4379	-1.58803	-1.64389	-1.3898	-0.940892	-1.32249	-1.94667
		STD
	[ParB] uM	WT	S74A	Q82A	R139A	N136A	R103A	Q58A	R60A	E135A	E102A	G79S	R104A
	12.5	1.5351	1.30318	2.96199	0.95125	1.10502	2.1609	0.14125	2.13265	2.50344	1.6954	0.276731	0.934952
	6.25	1.50471	0.361694	1.84774	1.04578	1.59339	0.727929	0.351898	1.42287	0.758164	0.813907	0.661911	0.836837
	3.125	1.28003	0.572321	0.915007	0.870768	1.19168	0.743223	0.950394	0.856906	1.02309	0.687751	1.29722	0.942705
	1.5625	1.30752	0.7387	0.395011	1.1434	1.62832	0.829609	1.53221	1.14857	1.3413	0.685805	0.771273	1.07681
	0.78125	1.91468	1.53681	0.344699	1.21072	1.32822	0.316045	1.99317	1.87505	0.887002	0.209406	0.64783	0.894961
