# Supplementary material for: A CTP-dependent gating mechanism enables ParB spreading on DNA
Source: eLife journal article supplement (doi:10.7554/elife.69676), 2021-08-01
Supplement: fig6-data1 [file Summary_total_Xink_fraction.xlsx]

## Sheet: Sheet1
crosslinnked fraction (%)
Average														STD
[CTP] nM	WT	S74A	Q82A	R139A	N136A	R103A	Q58A	R60A	E135A	E102A	G79S	R104A		WT	S74A	Q82A	R139A	N136A	R103A	Q58A	R60A	E135A	E102A	G79S	R104A
0	35.3303	27.2434	29.1187	23.4951	46.2812	21.4107	60.4786	27.1756	62.4838	32.6448	27.3952	26.5838		2.3412	3.1723	2.26043	2.90612	3.02837	6.59472	0.435623	1.37236	2.65786	5.70796	0.437514	8.18581
1	32.3984	27.3021	30.6213	26.909	51.3288	30.2158	63.2335	32.552	68.337	30.9765	27.1636	23.4343		2.52461	2.64025	3.05289	2.73622	1.36326	4.52416	1.99955	4.88825	4.64062	3.78671	1.50545	1.35816
5	38.3621	29.7951	33.9698	25.7027	53.3739	25.1793	65.0095	29.0796	77.1927	36.4235	24.71	23.0728		2.5428	1.26672	3.7873	3.27374	1.80972	3.52197	9.69895	5.66417	0.748326	1.51129	3.63482	3.3593
10	41.6193	29.836	35.6433	23.6203	54.7986	26.8118	76.1457	31.2567	83.057	43.0973	28.4483	23.6467		1.86598	2.07926	4.31745	3.54427	2.10985	1.79487	3.38794	10.1307	2.93605	1.03077	3.16579	4.00618
50	77.5883	30.0149	62.3361	28.4152	57.221	26.4208	79.2797	34.9066	79.6828	82.7676	26.2988	24.5005		0.517937	1.78253	7.1514	2.44132	3.83321	3.65782	3.06436	3.80906	4.6458	1.67987	2.31203	3.26998
100	79.9521	29.2954	76.3291	23.8796	50.3616	25.9837	82.4608	32.8251	81.8584	81.0082	29.8022	23.3647		1.32931	1.09645	2.9022	3.27963	3.54675	2.53983	5.51503	1.50526	2.66234	0.90913	3.94484	2.81456
500	81.4049	31.2462	77.1147	28.1006	59.4906	31.049	79.0308	43.4045	79.5357	82.1316	41.7492	22.716		3.14169	1.97847	2.75127	2.48361	1.83098	4.95654	4.19148	1.90526	2.92116	0.68725	3.45535	4.19869
1000	79.8079	39.5163	76.2573	35.2198	64.0168	34.2217	77.6784	48.9198	80.8827	79.7809	62.1332	22.9321		1.21563	2.15483	3.47076	3.13895	2.55574	2.88129	3.00781	2.94843	3.26758	2.5543	3.94412	4.02682
