# Supplementary figures and images for: A CTP-dependent gating mechanism enables ParB spreading on DNA
Source: eLife journal article supplement (doi:10.7554/elife.69676), 2021-08-01

XX —  
 X 304C —  
 X 224C —  
 PurB —  
 (L224C I304C)  
 LANE

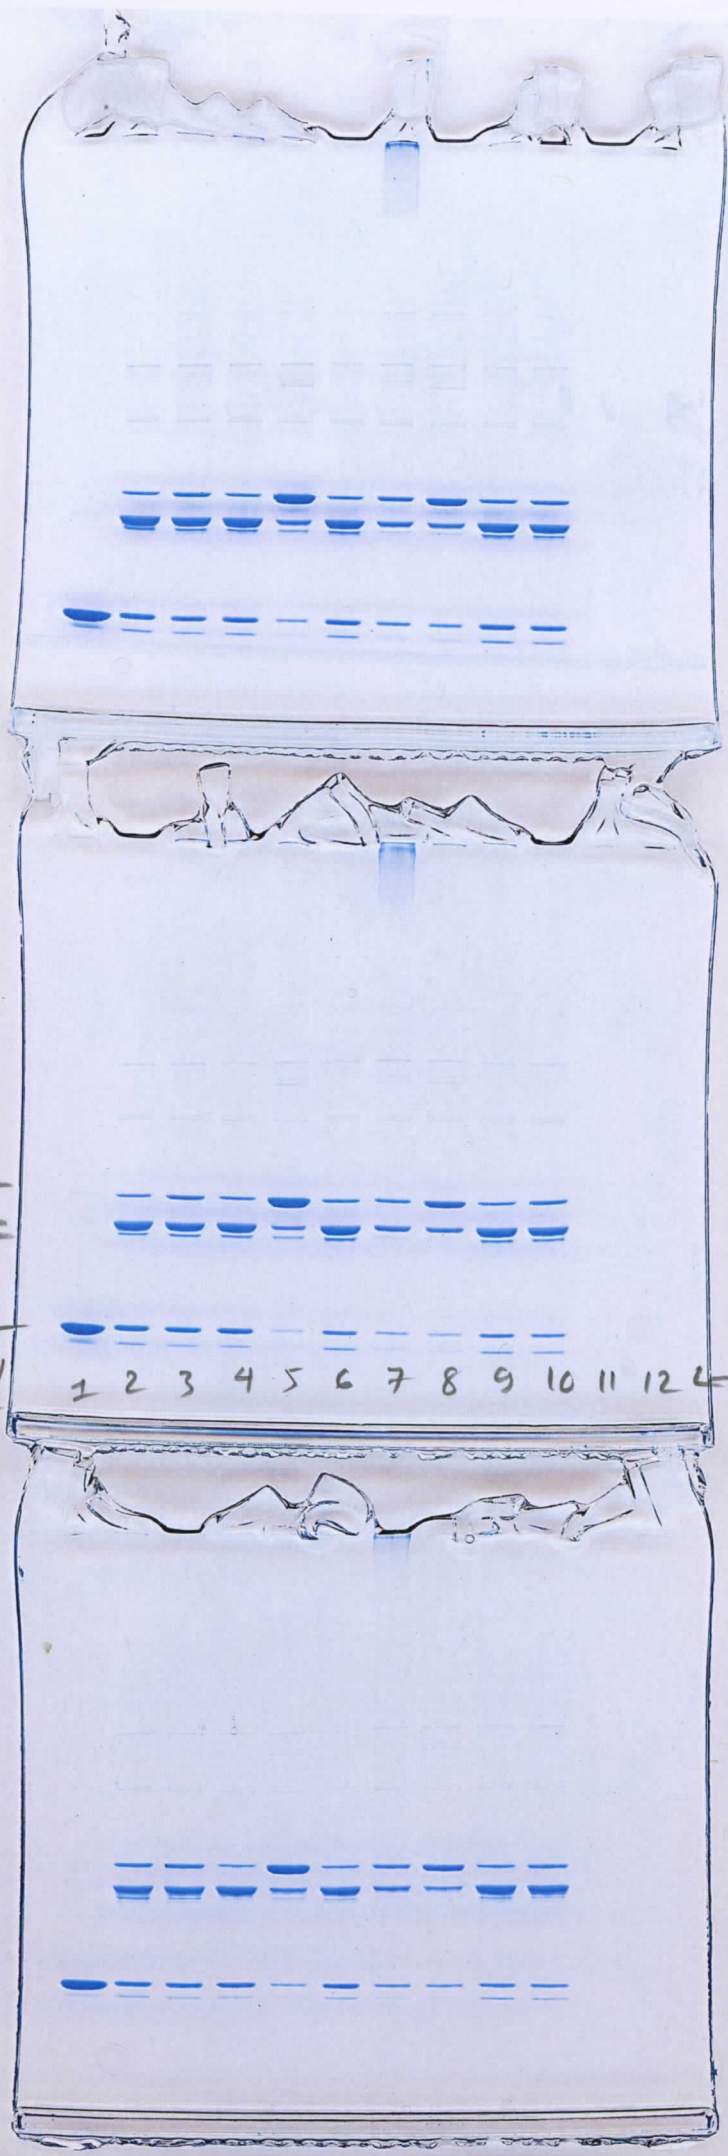

lanes as appeared in figure.

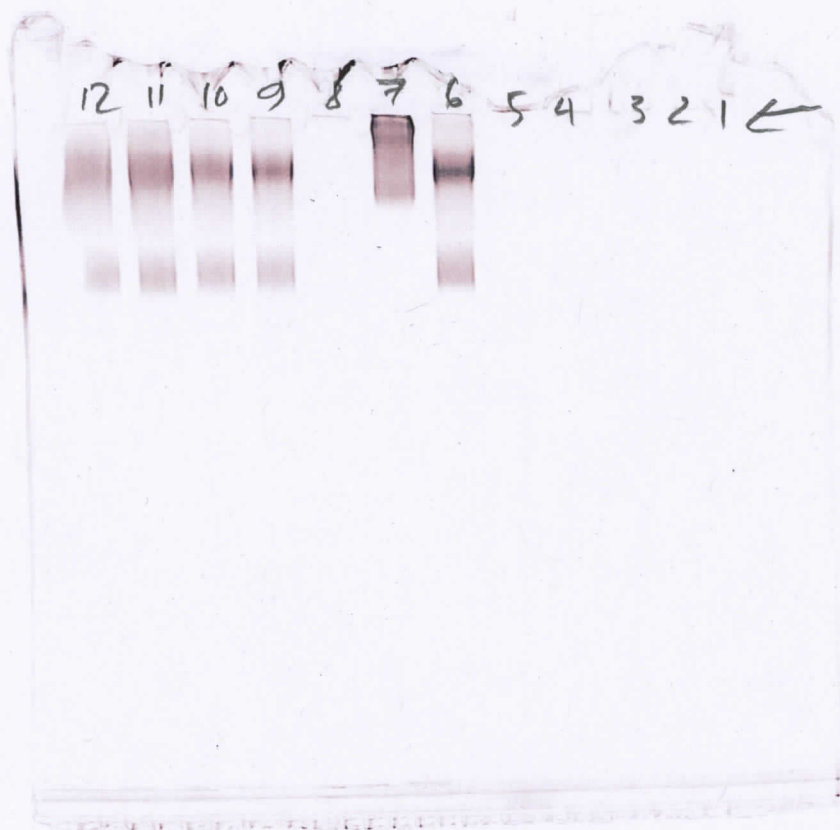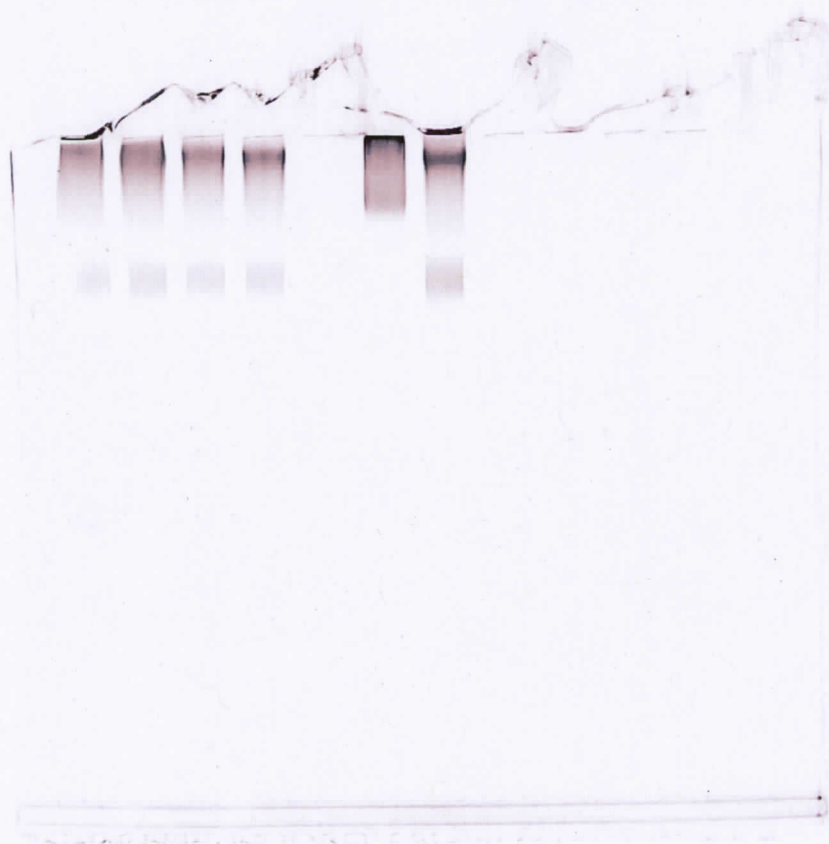

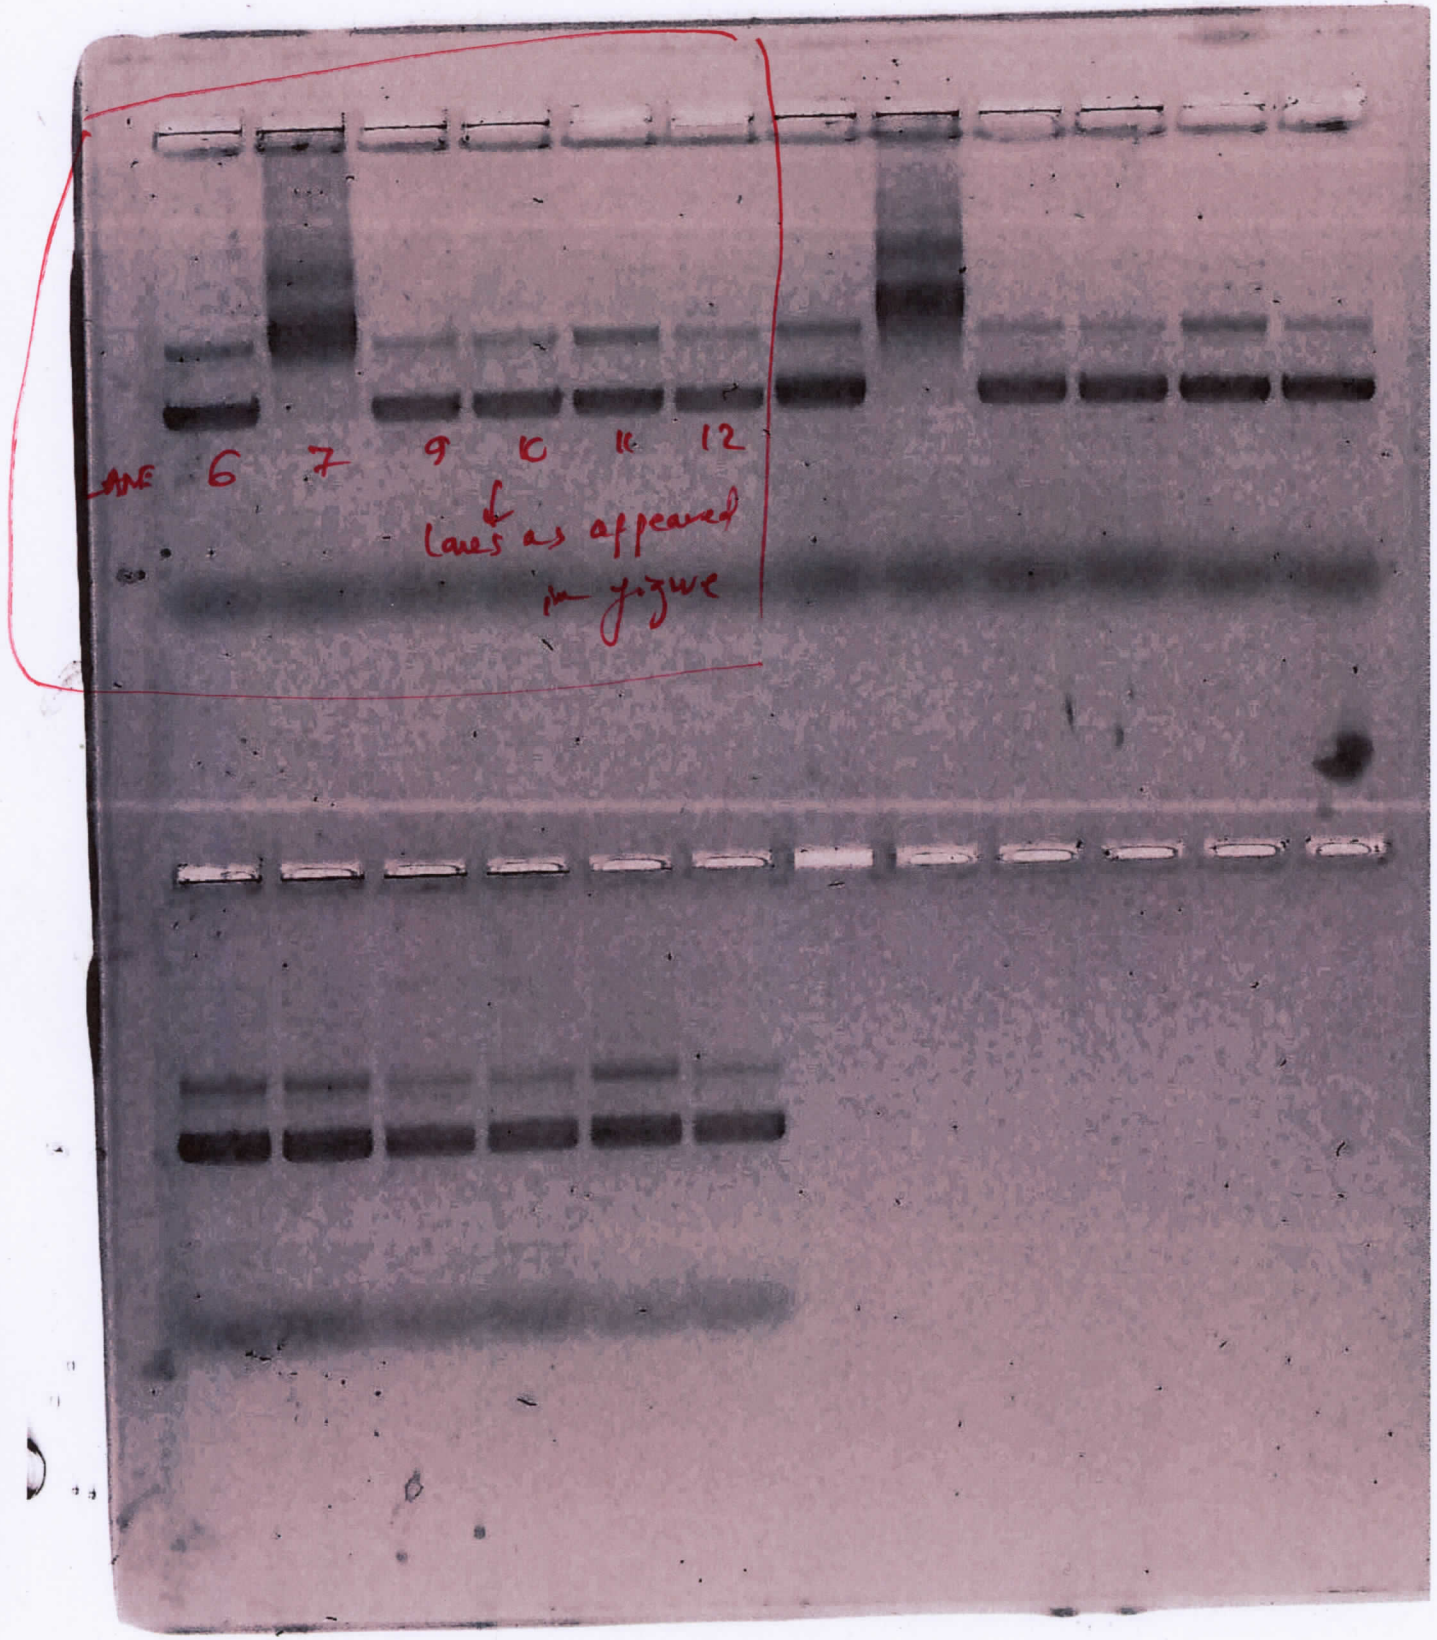

LANE 6 7 9 10 11 12  
↓  
lanes as appeared  
in figure

Supplement: fig5-data1 [file Annotation.pdf › Figure5/PanelD/Annotation.pdf]

Fig 5 - figsupp1

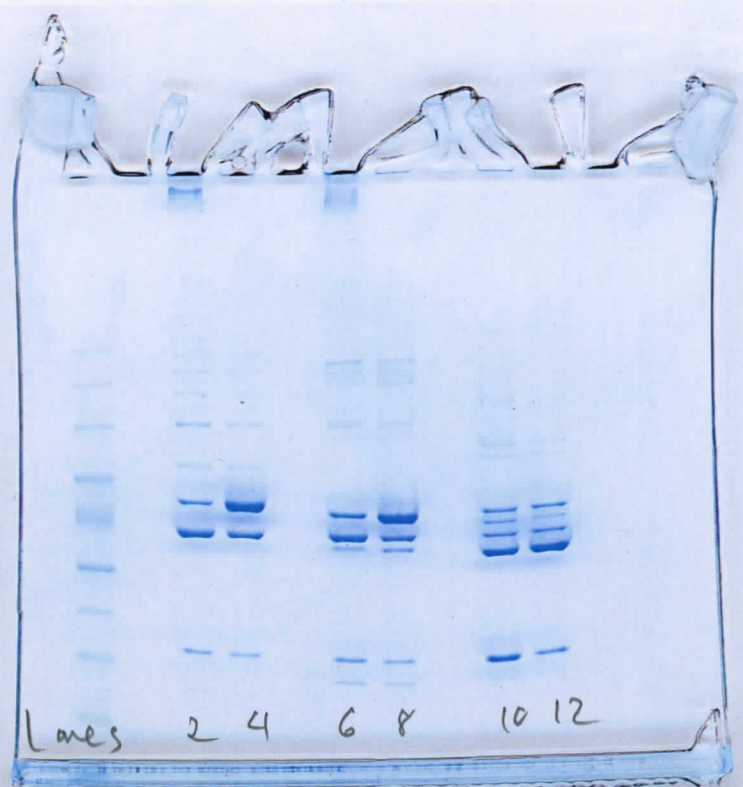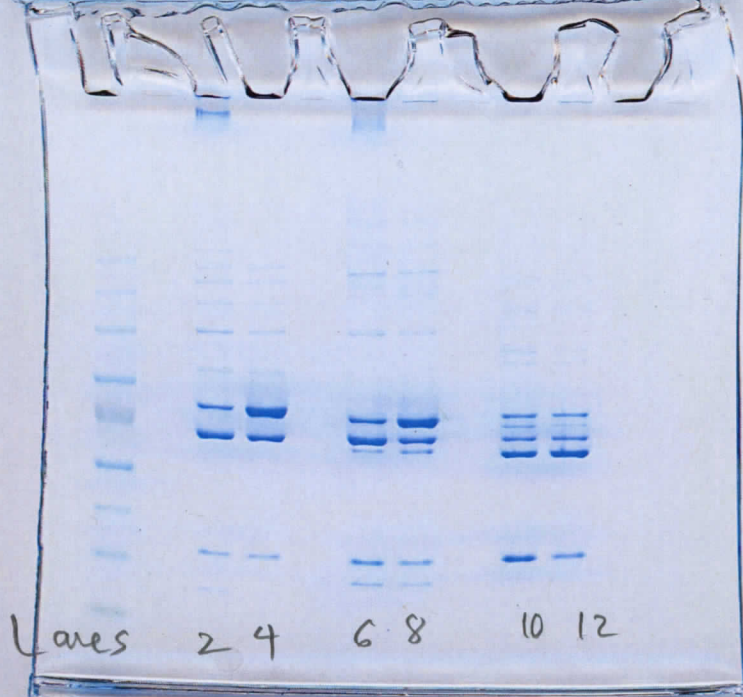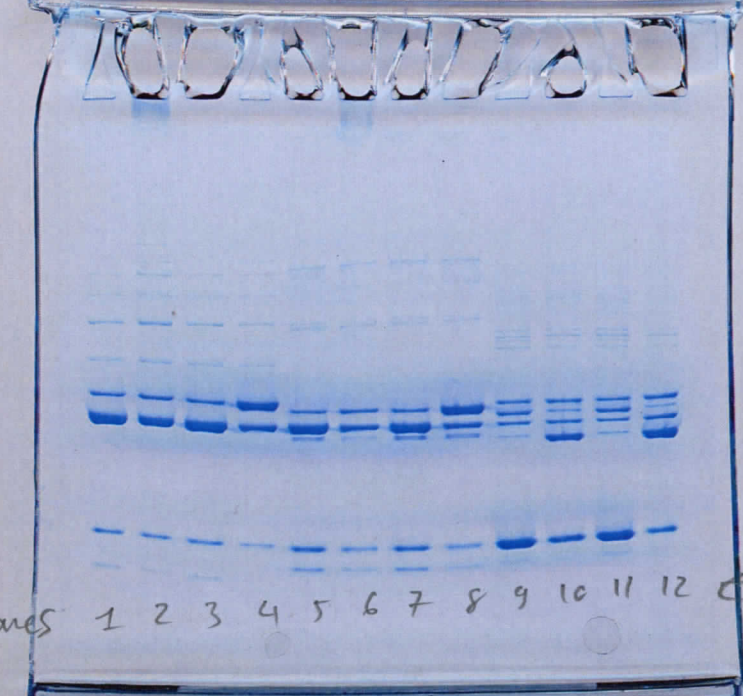

in figure  
as in figure.

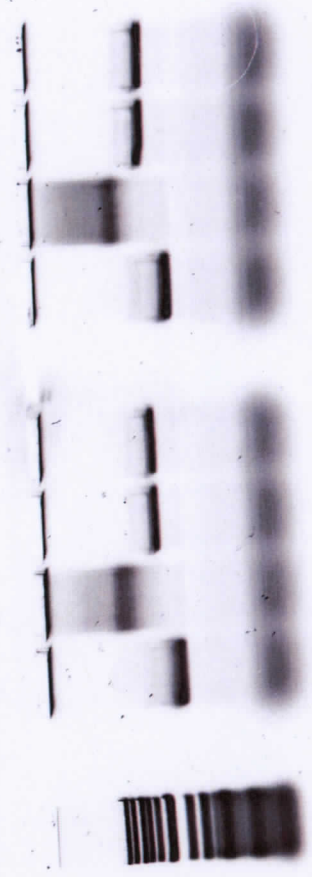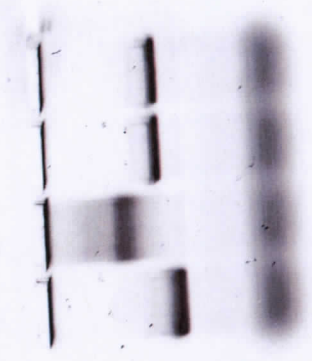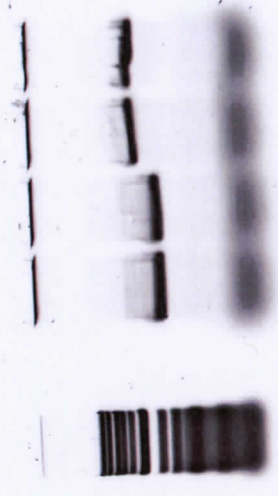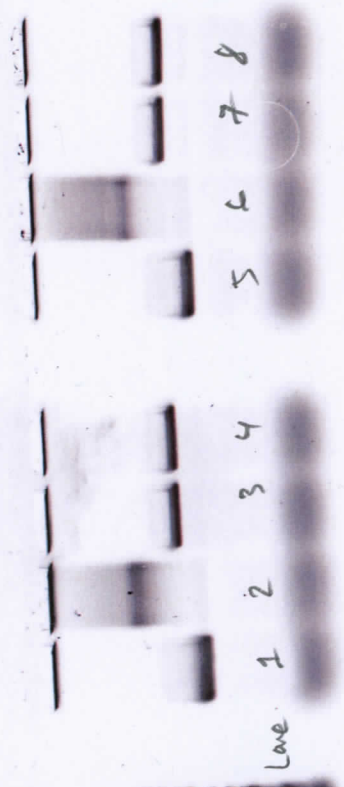

5 6 7 8

3 4

Lane 1 2

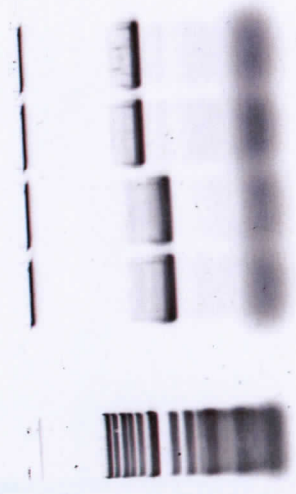

9 10 11 12 ← as in figure

Supplement: fig5-figsupp1-data1 [file elife-69676-fig5-figsupp1-data1-v1.zip]

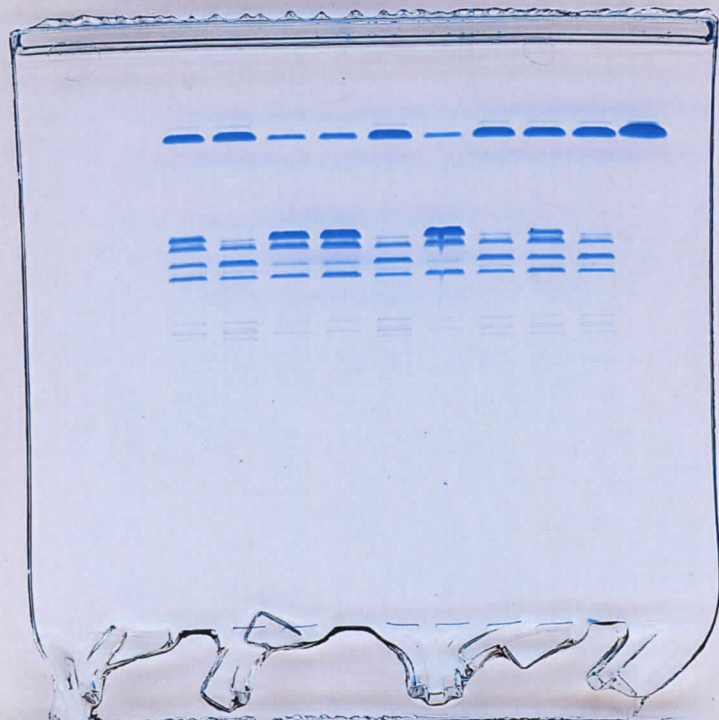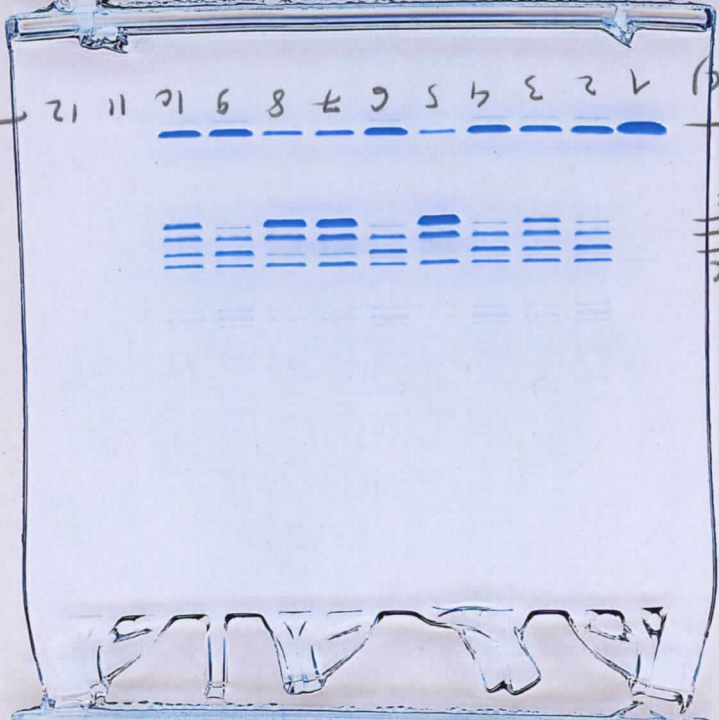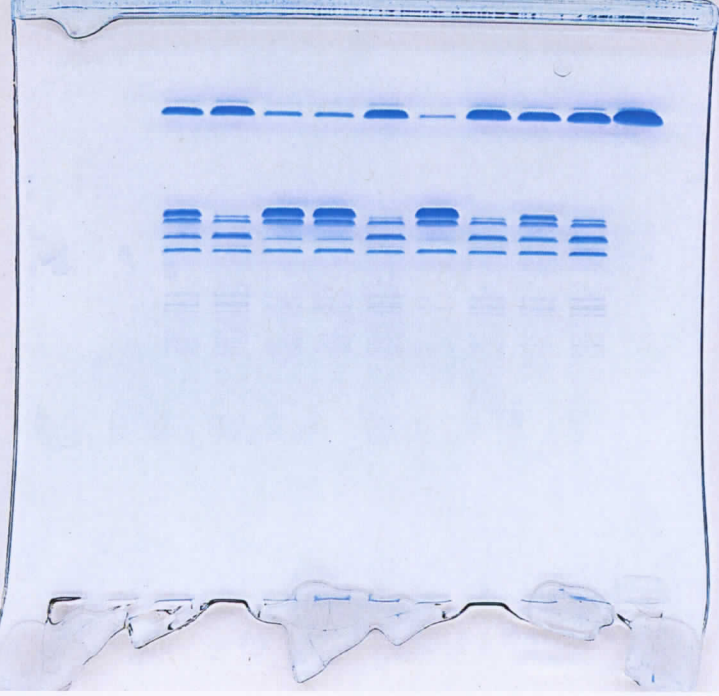

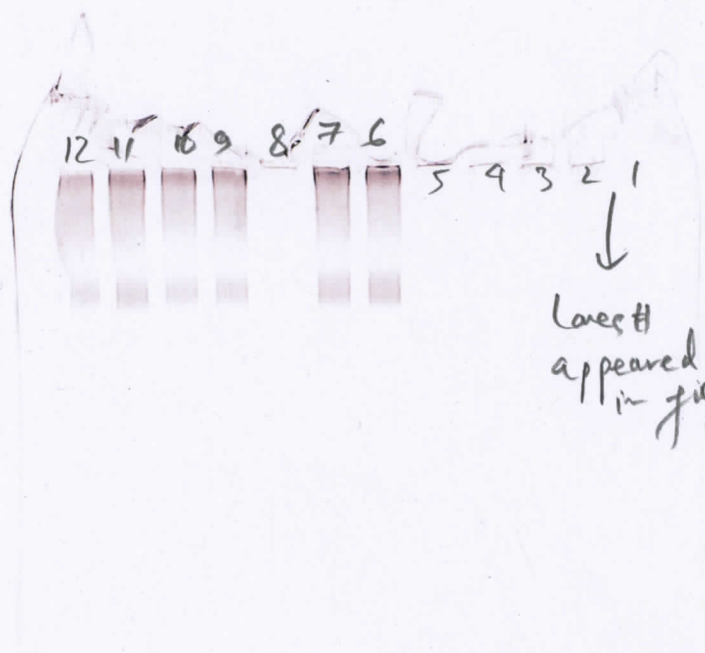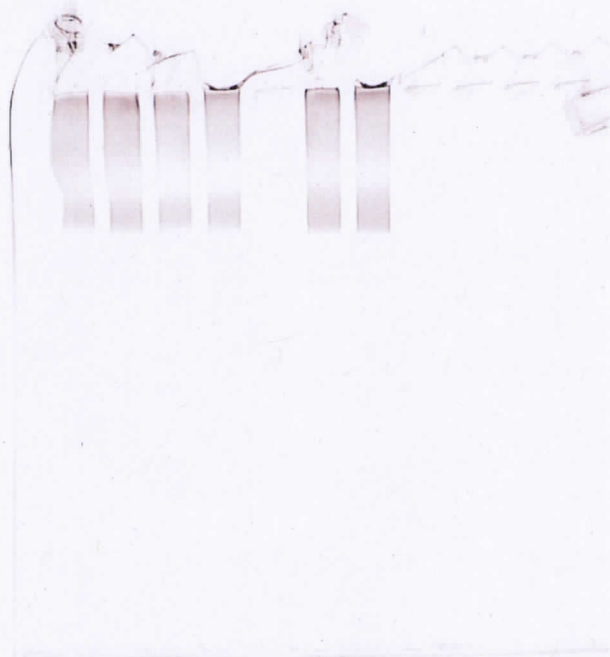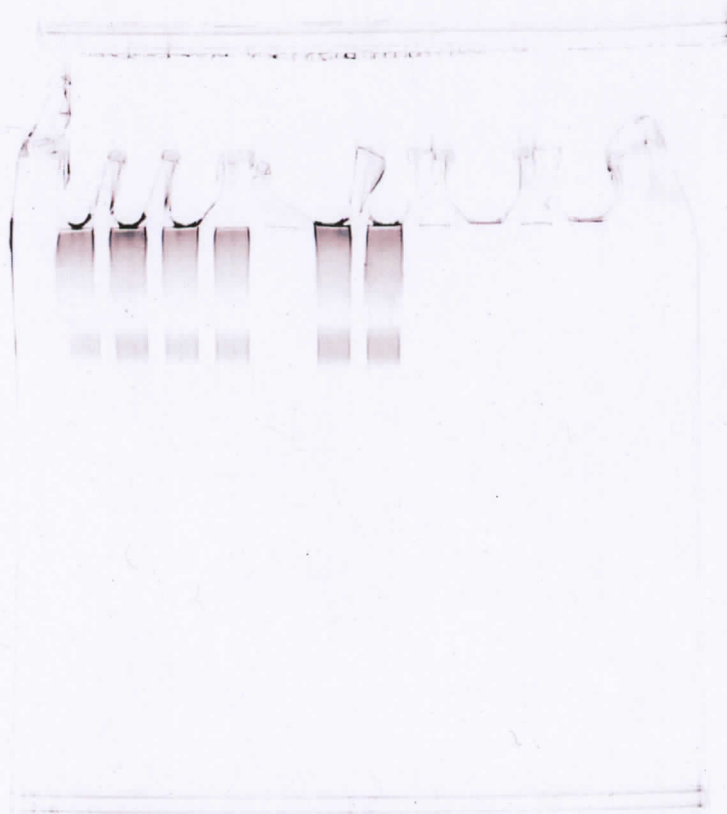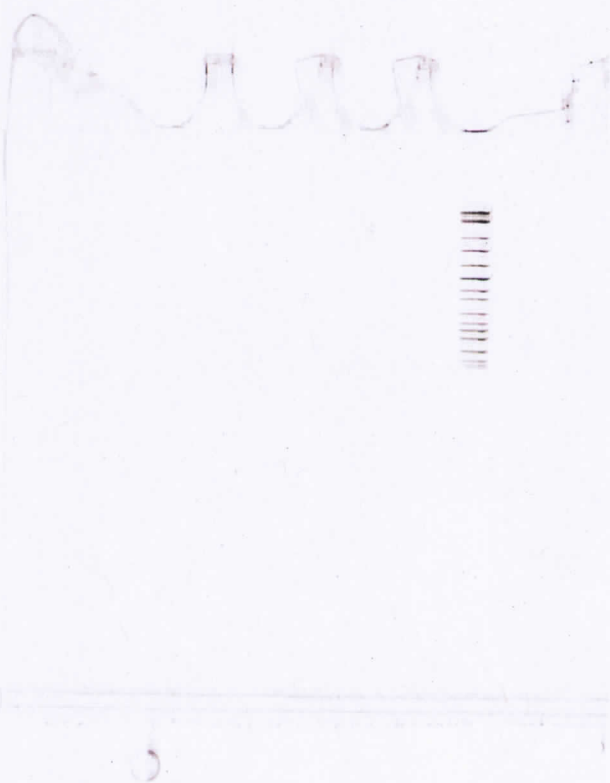

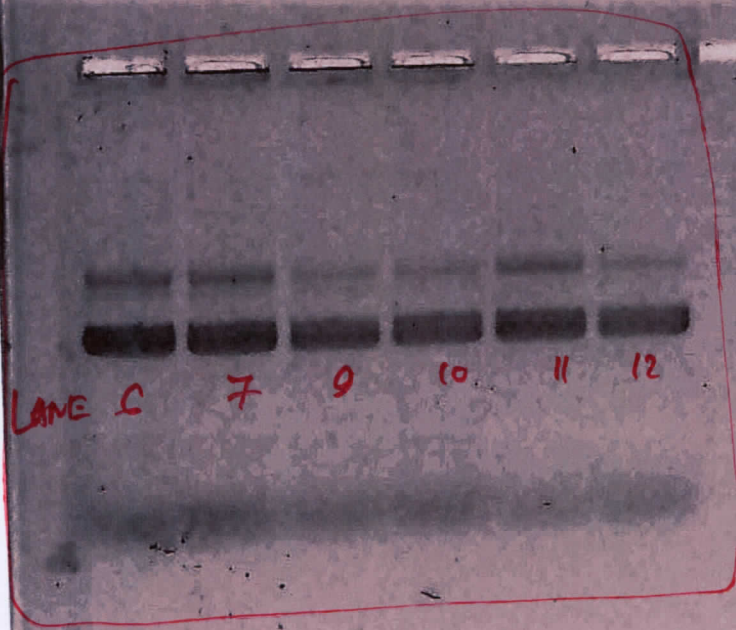

Supplement: fig5-figsupp2-data1 [file elife-69676-fig5-figsupp2-data1-v1.zip]

Fig 5 - ~~fig~~ supp 3  
(A)

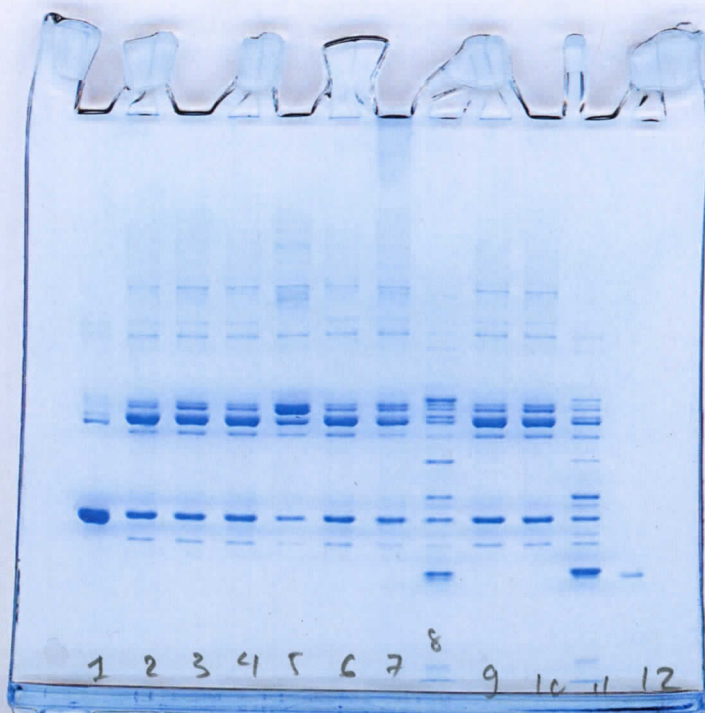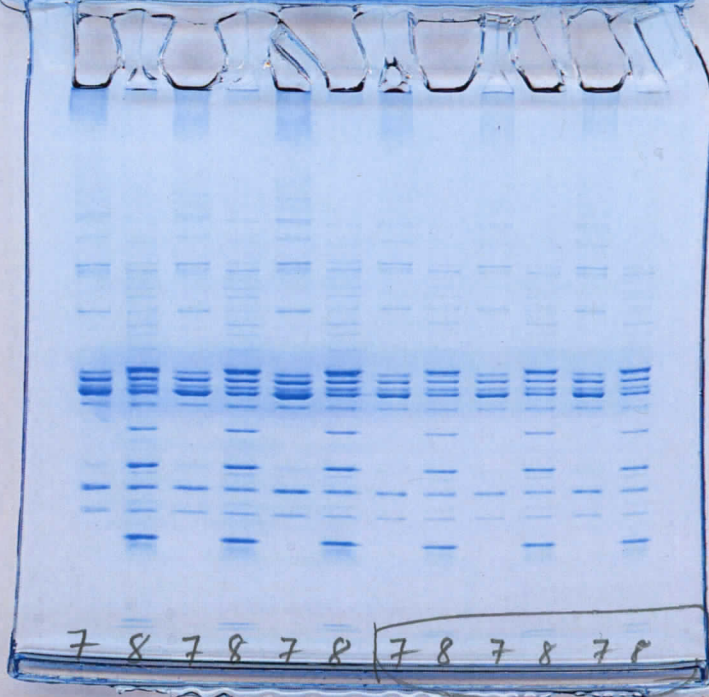

→ less volume loaded

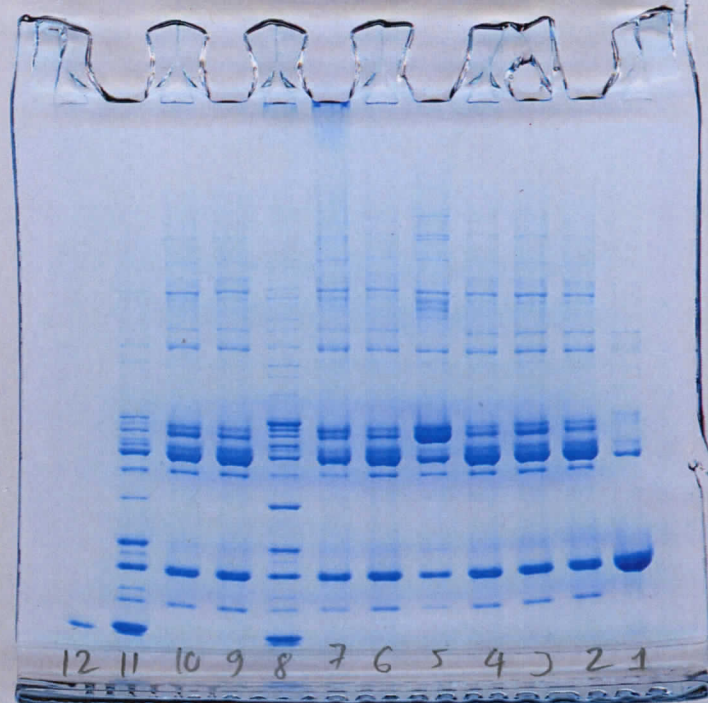

LANES (as in figure)

Supplement: fig5-figsupp3-data1 [file elife-69676-fig5-figsupp3-data1-v1.zip]

→ no protein control.

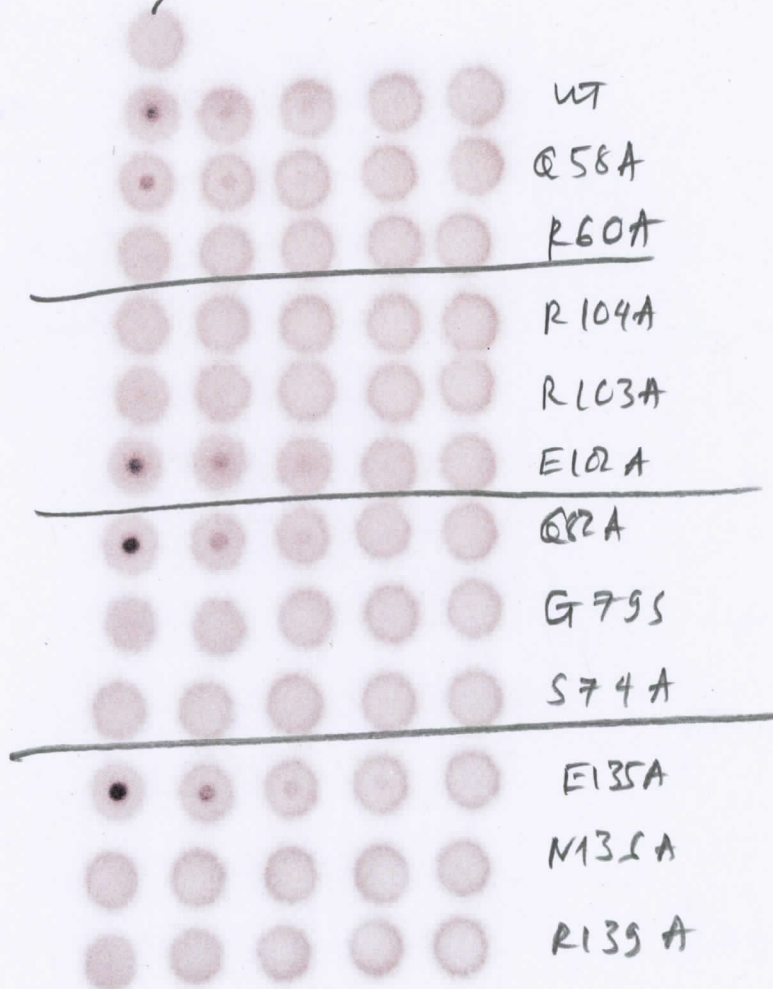

Supplement: fig6-data1 [file Annotation.pdf › Figure6/PanelA/Annotation.pdf]

CFP-ParB(wt)    CFP-ParB(E102A)

1   2      1   2

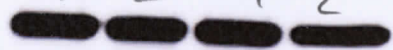

← non-specific band

λ-GFD

] GFP-ParB

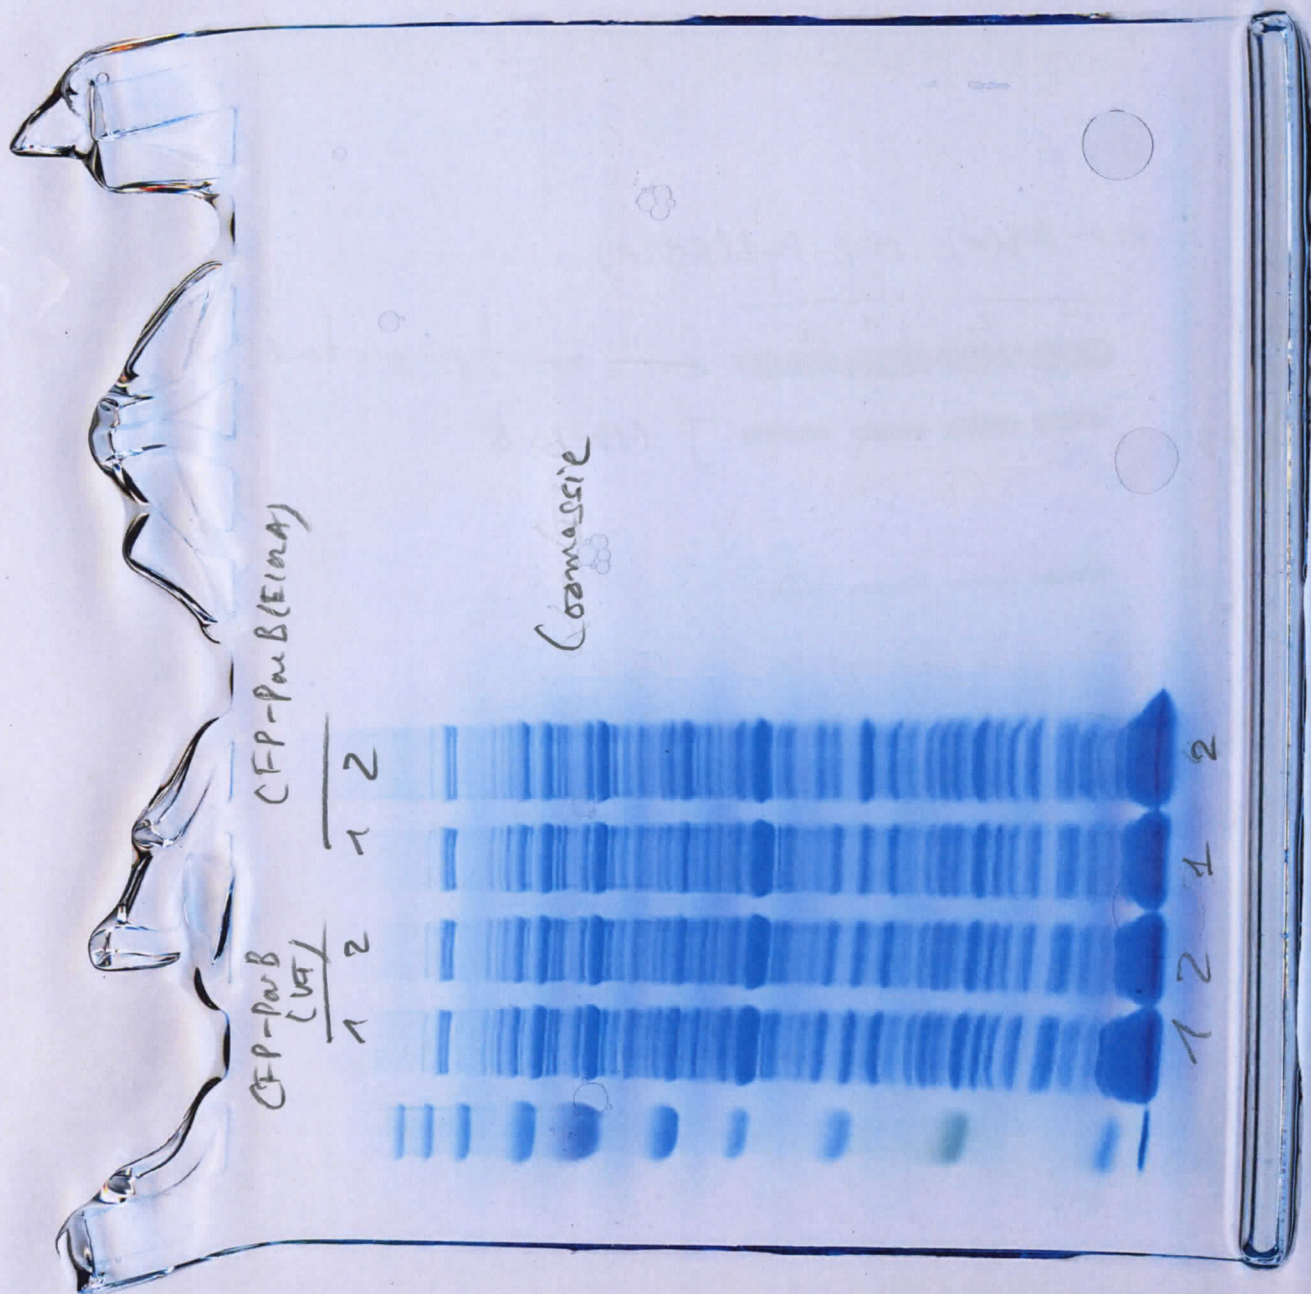

Supplement: fig8-figsupp1-data1 [file elife-69676-fig8-figsupp1-data1-v1.zip]

(A)

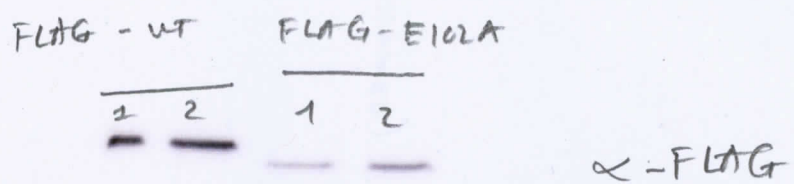

Comassie

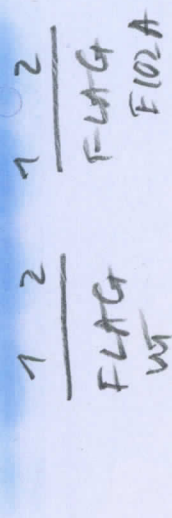

Supplement: fig8-figsupp1-data1 [file elife-69676-fig8-figsupp1-data1-v1.zip]

PYE + xylose

WT = ParB (WT)

7=Q58A

10=R60A

13=E102A

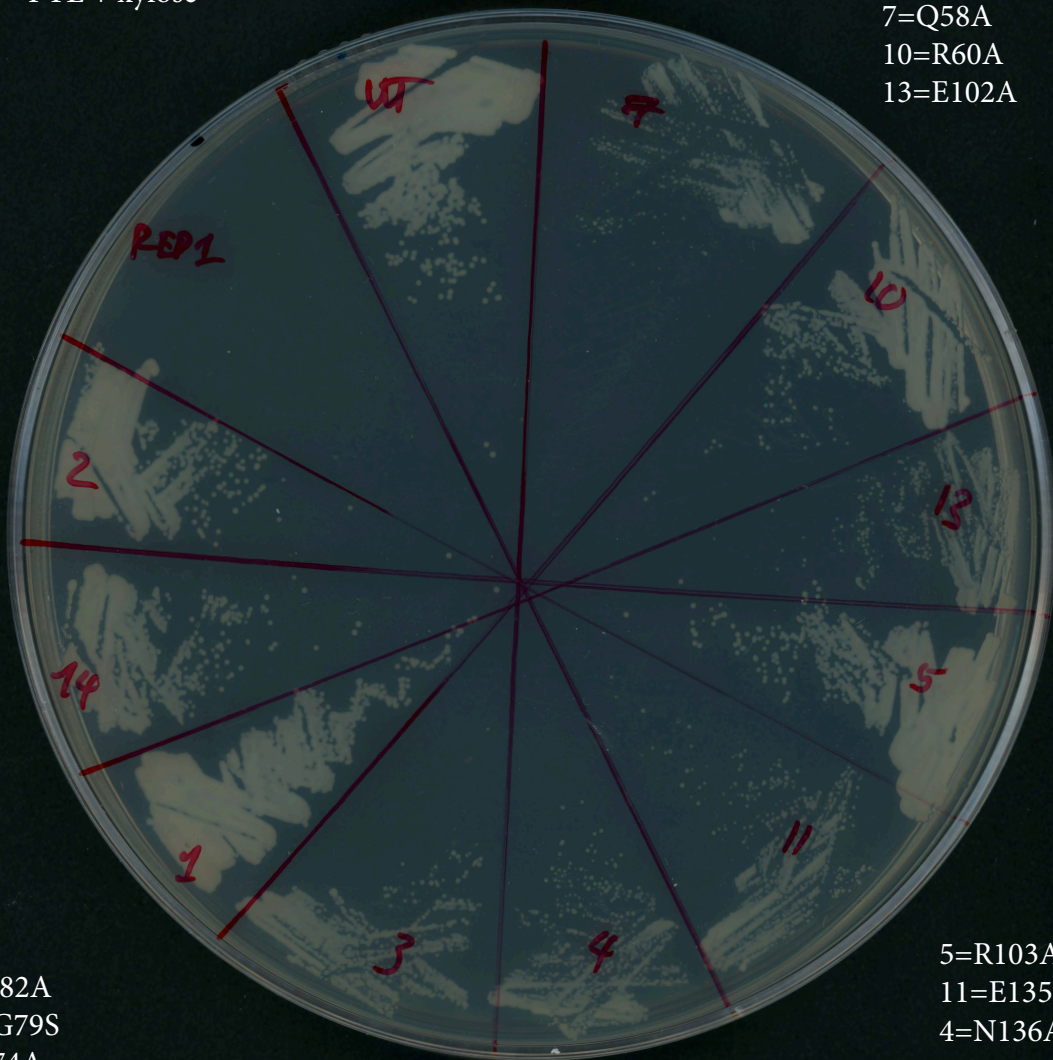

2=Q82A

14=G79S

1=S74A

3=R139A

5=R103A

11=E135A

4=N136A

PYE + glucose

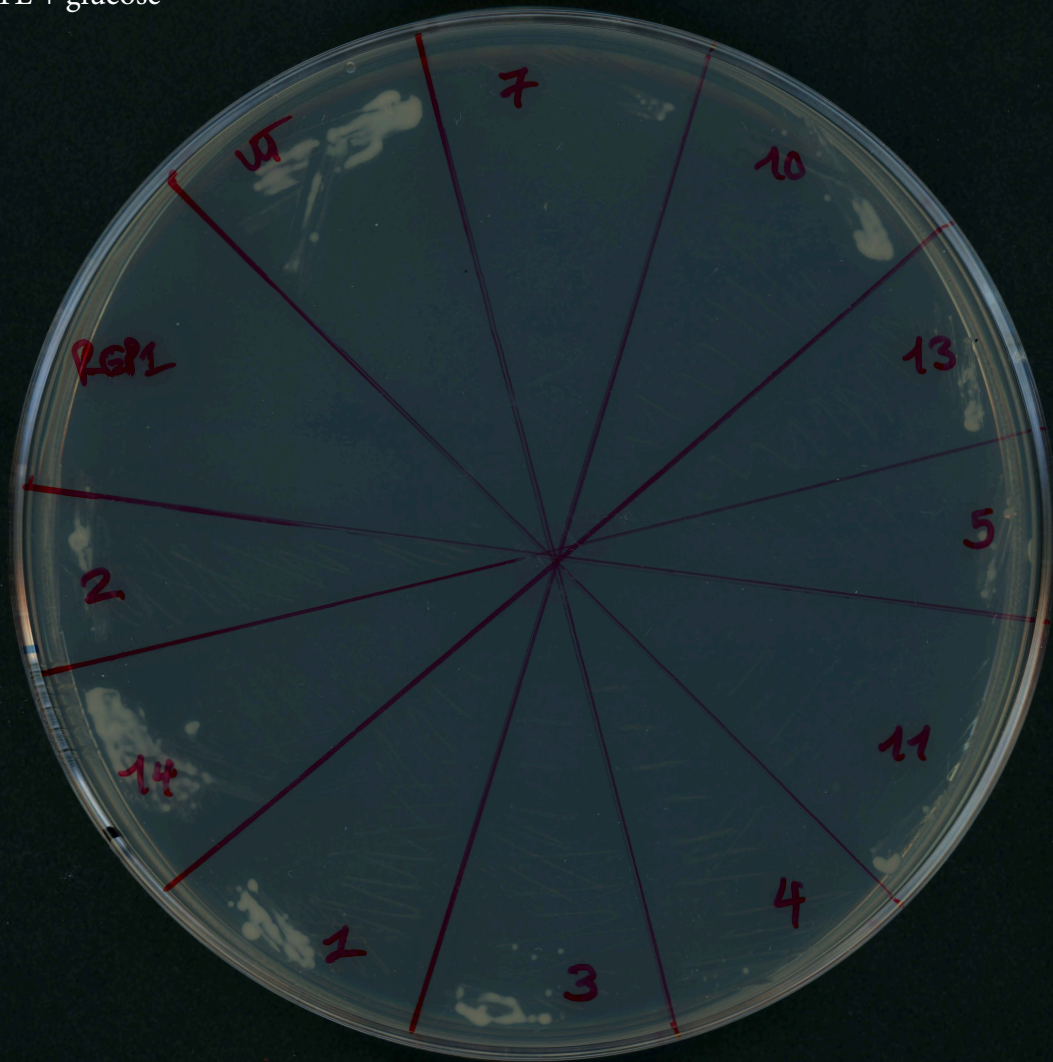



PYE + glucose + vanillate

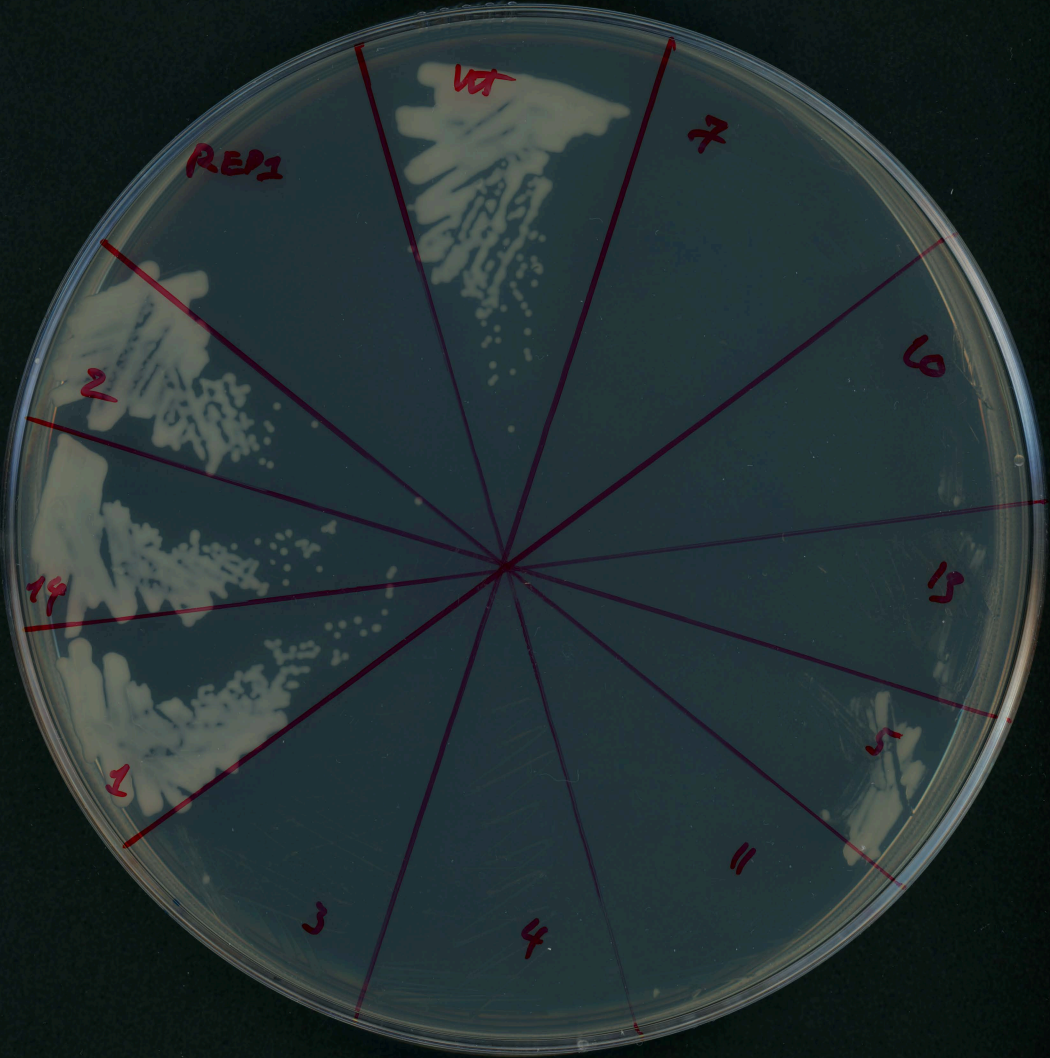

Supplement: fig8-figsupp2-data1 [file elife-69676-fig8-figsupp2-data1-v1.zip]
